1 **Rhomboid protease RHBDL4 promotes retrotranslocation of aggregation-prone**  
2 **proteins for degradation**

3  
4 Josephine Bock<sup>1,2,5</sup>, Nathalie Kühnle<sup>1,5</sup>, Julia D. Knopf<sup>1,2</sup>, Nina Landscheidt<sup>1</sup>, Jin-Gu Lee<sup>3,4</sup>,  
5 Yihong Ye<sup>3</sup> and Marius K. Lemberg<sup>1,2,\*</sup>

6  
7 <sup>1</sup>Center for Molecular Biology of Heidelberg University (ZMBH), DKFZ-ZMBH Alliance, Im  
8 Neuenheimer Feld 282, 69120 Heidelberg, Germany.

9 <sup>2</sup>Center for Biochemistry, Medical Faculty, University of Cologne, Joseph-Stelzmann-Strasse  
10 52, 50931 Cologne, Germany.

11 <sup>3</sup>Laboratory of Molecular Biology, National Institutes of Health, Bethesda, MD 20892, USA.

12 <sup>4</sup>Present address: University of Maryland School of Medicine, 670 West Baltimore Street,  
13 Baltimore, MD 21201, USA.

14 <sup>5</sup>These authors contributed equally to this work.

15 \*Corresponding author: m.lemborg@uni-koeln.de

16  
17 **Running title:** Pre-aggregate clearance by RHBDL4

18  
19 **Keywords:** intramembrane proteolysis / rhomboid family protein / ER-associated protein  
20 degradation / prohibitin family proteins Erlin1 and Erlin2 / protein aggregates

21  
22 **Abstract**

23 Protein degradation is fundamentally important to ensure cell homeostasis. In the  
24 endoplasmic reticulum (ER), the ER-associated degradation (ERAD) pathway targets  
25 incorrectly folded and unassembled proteins into the cytoplasm for turnover by the  
26 proteasome. In contrast, lysosomal degradation serves as a failsafe mechanism for removing  
27 proteins that resist ERAD by forming aggregates. Previously, we showed that the ER-  
28 resident rhomboid protease RHBDL4, together with p97, mediates membrane protein  
29 degradation. However, whether RHBDL4 acts in concert with additional ERAD components  
30 is unclear, and its full substrate spectrum remains to be defined. Here, we show that besides  
31 membrane proteins, RHBDL4 cleaves aggregation-prone luminal ERAD substrates. Because  
32 RHBDL4 with mutations in the rhomboid domain leads to stabilization of substrates at the  
33 cytoplasmic side, we hypothesize that analogue to the homologue ERAD factor derlin,  
34 RHBDL4 is directly involved in substrate retrotranslocation. RHBDL4's interaction with the  
35 erlin ERAD complex and reciprocal interaction of rhomboid substrates with erlins suggest  
36 that RHBDL4 and erlins form a complex that clips substrates and thereby rescues  
37 aggregation-prone peptides in the ER lumen from terminal aggregation.

## 38 **Introduction**

39 Around one-third of all proteins enter the secretory pathway through the endoplasmic  
40 reticulum (ER), turning it into a crowded folding compartment. Even though numerous factors  
41 assist folding and complex assembly, this is an error-prone process, and misfolded  
42 polypeptides or orphan complex subunits arise that are commonly removed by the ER-  
43 associated degradation (ERAD) pathway (Christianson and Ye, 2014; Juszkievicz and  
44 Hegde, 2018; Ruggiano et al., 2014; Wu and Rapoport, 2018). If the burden of misfolded  
45 proteins exceeds the capacity of the protein homeostasis (proteostasis) network,  
46 aggregation-prone polypeptides form clusters. Depending on the protein, these clusters  
47 consist of unstructured, amorphous aggregates or structured  $\beta$ -sheet amyloid fibres (Balchin  
48 et al., 2016; Breydo and Uversky, 2015). Protein aggregates cause cellular toxicity and are a  
49 hallmark of several diseases, including neurodegenerative disorders like Alzheimer's or  
50 Parkinson's disease (Chiti and Dobson, 2017). Clearance of large misfolded protein species  
51 in the ER is accomplished by selective autophagy (ER-phagy) or a recently described  
52 vesicular ER-to-lysosome trafficking pathway (Molinari, 2021). However, if not terminally  
53 aggregated, the best-characterized mechanism for the turnover of aberrant proteins is  
54 ERAD. Here, as part of the canonical ER quality control, misfolded proteins are recognized  
55 by a network of protein factors, including chaperones, glycan-modifying enzymes, protein  
56 disulfide isomerases, and reductases (Christianson et al., 2011).

57  
58 ERAD consists of several parallel pathways that allow the removal of an exceptionally  
59 diverse set of aberrant proteins. Best understood in yeast, three major degradation routes,  
60 namely ERAD-L, ERAD-M and ERAD-C, are formed by distinct E3 ubiquitin ligase  
61 complexes that recognize proteins with lesions in the lumen, ER membrane or cytoplasm,  
62 respectively (Carvalho et al., 2006; Denic et al., 2006). Although this distinction may not be  
63 as strict in mammalian cells, defined sets of quality control factors still assist turnover of  
64 different protein classes (Bernasconi et al., 2010; Christianson et al., 2011). Glycosylated  
65 ERAD-L substrates often engage the lectins calnexin and calreticulin,  $\alpha$ 1-mannosidases  
66 (EDE1, -2 and 3) and the disulfide reductase ERdj5 that collectively routes proteins via  
67 Sel1 to the E3 ubiquitin ligase Hrd1 (McCaffrey and Braakman, 2016; Ruggiano et al., 2014).  
68 Moreover, for turnover of soluble ERAD substrates, frequently catalytically-inactive rhomboid  
69 protease homologues referred to as pseudoproteases (Der1 and Dfm1 in yeast; Derlin1, -2  
70 and -3 in humans) are required (Christianson et al., 2011; Greenblatt et al., 2011; Vashist  
71 and Ng, 2004). After recruitment to an E3 ubiquitin ligase complex containing a derlin protein,  
72 ERAD-L substrates are retrotranslocated across the ER membrane to reach the proteasome  
73 (Wu and Rapoport, 2018). To this end, ERAD substrates are extracted by the AAA+-ATPase  
74 p97 (Cdc48 in yeast), deglycosylated by an N-glycanase and targeted to the proteasome

75 (Hirsch et al., 2003; Ye et al., 2001). Work in yeast and *in vitro* suggests that for ERAD-L  
76 substrates, Hrd1 forms the core of a retrotranslocation channel (Baldrige and Rapoport,  
77 2016; Schoebel et al., 2017). Consistent with this, a recent cryo-EM structure of the yeast  
78 Hrd1 complex revealed a sizable pore formed by two half-channels consisting of Hrd1 and  
79 Der1, which can accommodate a wide range of ERAD substrates, including bulky N-linked  
80 glycans (Wu et al., 2020). However, alternative ERAD pathways exist, as for example,  
81 degradation of activated inositol 1,4,5-triphosphate IP(3) receptors in mammals engages a  
82 Mega-Dalton (MDa) complex consisting of multiple copies of the type II membrane proteins  
83 Erlin1 and -2 and the E3 ubiquitin ligase RNF170 (Lu et al., 2011; Pearce et al., 2007;  
84 Pearce et al., 2009) but not Hrd1. As a variation to the theme, several ERAD substrates are  
85 processed by intramembrane proteases before extraction from the ER membrane (Avci and  
86 Lemberg, 2015). Accordingly, the rhomboid intramembrane protease RHBDL4 has been  
87 linked to ERAD (Fleig et al., 2012; Paschkowsky et al., 2018) that impacts key aspects of the  
88 secretory pathway such as tuning the N-linked glycosylation machinery and the rate of ER  
89 export (Knopf et al., 2020; Wunderle et al., 2016). RHBDL4 uses a bipartite substrate  
90 recognition mechanism to select certain membrane proteins with unstable TM domains.  
91 Primarily, RHBDL4 recognizes positively charged residues within TM domains (Fleig et al.,  
92 2012; Paschkowsky et al., 2018), which destabilize the TM helix and act as a degradation  
93 signal (degron) of ERAD-M substrates (Bonifacino et al., 1990). As a second layer of control,  
94 substrate recognition occurs through a conserved ubiquitin-interacting motif at the cytosolic  
95 C-terminal tail of RHBDL4 (Fleig et al., 2012). Therefore, RHBDL4 does not solely rely on  
96 one recognition mechanism. Rather, it integrates different information, including substrate  
97 ubiquitination, before it performs the irreversible action of cleavage. What features determine  
98 whether a protein enters a classical ERAD pathway or is first cleaved by RHBDL4 or another  
99 ER protease is unknown.

100

101 By asking what influence different proteostasis factors have on the turnover of ERAD-L  
102 substrates, we discovered that in addition to its role in ERAD-M, RHBDL4 serves as a non-  
103 canonical factor in the clearance of misfolded soluble proteins in the ER lumen. This shows  
104 that the substrate spectrum of rhomboid intramembrane proteases is more diverse than  
105 initially anticipated. Moreover, we demonstrate that for clearance of luminal substrates,  
106 RHBDL4 cooperates with the erlin complex, a putative ERAD recruitment factor for  
107 aggregation-prone peptides. Since RHBDL4 ablation increases the load of insoluble versions  
108 of its substrates, we suggest that the RHBDL4-erlin complex plays an essential role in pre-  
109 aggregate clearance from the ER lumen via dislocation of substrates into the cytoplasm and  
110 proteasomal degradation.

## 111 **Results**

### 112 *A targeted siRNA screen identifies RHBDL4 as an ERAD-L component*

113 To investigate principles of ERAD pathway selection, we transfected a soluble model ERAD  
114 substrate into Hek293T cells and analyzed its steady-state level in a siRNA screen. As model  
115 substrate, we generated a truncated version of the major histocompatibility complex (MHC)  
116 class I heavy chain of 202 amino acids (MHC202), which comprises an antiparallel  $\beta$ -sheet  
117 and two  $\alpha$ -helices formed by a tandem repeat of the so-called  $\alpha$ 1 and  $\alpha$ 2 domains ([Figure](#)  
118 [1A](#)). Based on the primary sequence and crystal structure of the MHC ectodomain (Bulek et  
119 al., 2012), we predicted that the soluble MHC202 truncation forms an unstable protein  
120 containing one N-linked glycan and one disulfide bridge that exposes an extensive  
121 hydrophobic surface ([Figure 1A](#), bottom panel right). For cell-based screening, we tested p97  
122 that is invariant for retrotranslocation of ERAD substrates and 40 proteins that are in the  
123 ERAD protein interaction network (Christianson et al., 2011; Christianson and Ye, 2014).  
124 While knockdown of p97 and the E3 ligase Hrd1 showed the strongest MHC202 steady-state  
125 increase, nine other candidates also showed a strong effect ([Figure 1B](#), [Figure 1 – figure](#)  
126 [supplement 1A](#) and [Supplementary file 1](#)). Among those were the Hrd1-associated ERAD  
127 factors Herp, Derlin2/3, Sel1, the  $\alpha$ 1-mannosidases EDEM1/2, and the disulfide reductase  
128 Erdj5. However, knockdown of the lectin OS9, which typically targets glycoprotein ERAD  
129 substrates to Sel1L did not alter MHC202 levels ([Figure 1B](#), [Figure 1 – figure supplement 1A](#)  
130 and [Supplementary file 1](#)), indicating a redundant function of the paralogue XTP3B that has  
131 been observed for certain other glycoproteins (van der Goot et al., 2018). While all these  
132 factors are known to be involved for recognition and degradation of ERAD-L substrates  
133 (Christianson et al., 2011), we also observed that knockdown of the putative membrane-  
134 integral ER quality control factor Bap29 (Abe et al., 2009) and the rhomboid intramembrane  
135 protease RHBDL4 (Fleig et al., 2012) caused a modest increase of the MHC202 steady-state  
136 level. These factors had not been linked to Hrd1-mediated ERAD (Christianson et al., 2011),  
137 indicating that also non-canonical factors contribute to MHC202-clearance.

138  
139 Intramembrane proteases are commonly believed to cleave only membrane-integral proteins,  
140 but exceptions are known (Kühnle et al., 2019). We, therefore, set out to characterize the  
141 unexpected role of RHBDL4 in MHC202 turnover. First, we confirmed that knockdown with  
142 two independent targeting sequences elevated MHC202 steady-state levels ([Figure 1 –](#)  
143 [figure supplement 1B](#)). The role of RHBDL4 in MHC202 turnover was further confirmed by  
144 cycloheximide chase in RHBDL4 knockout Hek293T cells, in which the half-live of MHC202  
145 turnover increased from less than one hour to approximately two hours ([Figure 1C](#)).  
146 However, inhibition was only partial, indicating that a redundant ERAD pathway targets  
147 MHC202 for degradation. Hence, we presume that induction of the ER unfolded protein

148 response (UPR) observed upon RHBDL4 ablation (Fleig et al., 2012) masks the RHBDL4  
149 knockout phenotype to a certain extent by upregulating alternative degradation routes. We  
150 generated Hrd1 knockout cells to investigate further whether RHBDL4 might act in parallel to  
151 the canonical Hrd1 pathway. The Hrd1 substrate null Hong Kong mutant of  $\alpha$ 1-antitrypsin  
152 (NHK) (Christianson et al., 2011) was fully stabilized in Hrd1 knockout cells, but the  
153 phenotype was reverted upon reexpression of Hrd1 (Figure 1 – figure supplement 1D). We  
154 then used metabolic pulse label chase analysis to follow up on the MHC202 degradation  
155 kinetics in Hrd1 knockout cells. While for newly synthesized MHC202 in Hek293T wild-type  
156 (wt) cells an initial fast decay was observed, a fraction persisted for a longer time different to  
157 the cycloheximide chase, increasing the apparent half-life to approximately 2 h (Figure 1 –  
158 figure supplement 1C). In contrast, in Hrd1 knockout cells, most MHC202 (~65%) was stable  
159 even up to 24 h (Figure 1D), indicating that Hrd1 is the prime degradation route for MHC202.  
160 Despite that prominent stabilization of MHC202 in Hrd1 knockout cells, the 24 h chase  
161 revealed that approximately 35 % of MHC202 was still degraded within 24 h (Figure 1D).  
162 However, knockdown of RHBDL4 in this genetic background leads to a further stabilization of  
163 MHC202 for up to 18 h (Figure 1D), indicating that RHBDL4 acts as a second slower  
164 degradation route. Taken together, these additive effects show that two independent  
165 pathways can remove MHC202 with different kinetics, namely canonical Hrd1-dependent  
166 retrotranslocation, and a so-far unrecognized pathway that relies on RHBDL4. The  
167 mechanism that removes MHC202 when Hrd1 and RHBDL4 are both blocked and whether  
168 ER-phagy can compensate awaits further characterization.

169

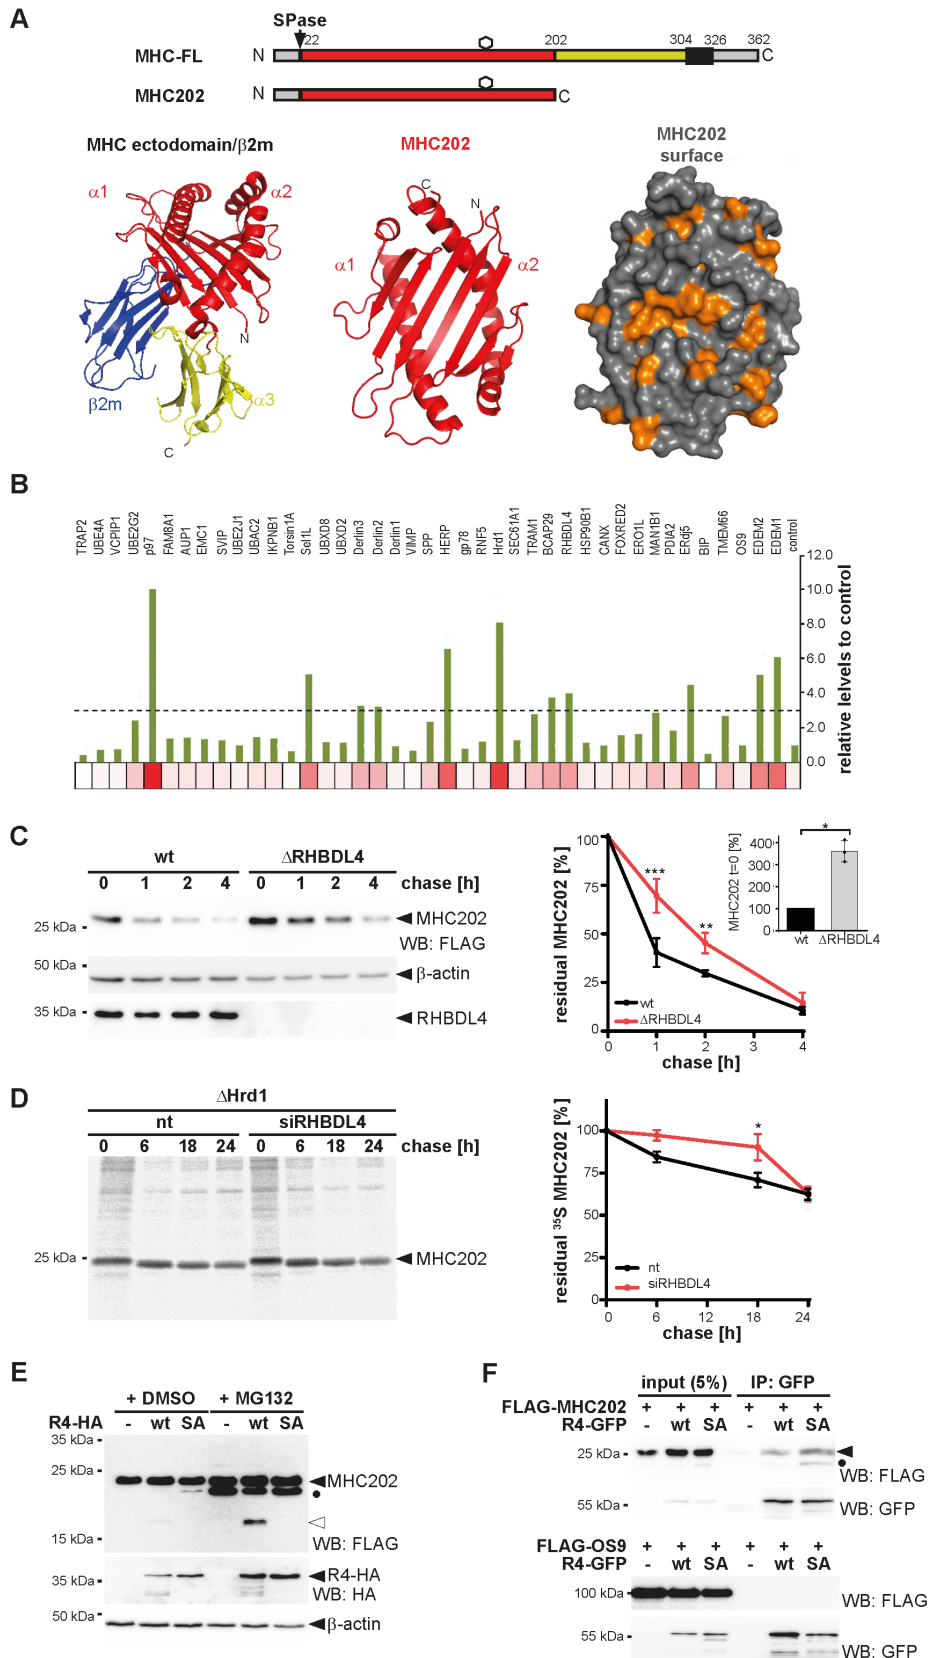

**Figure 1. RHBDL4 contributes to the efficient turnover of a soluble ERAD substrate.**

(A) Schematic representation of full-length MHC class I heavy chain (MHC-FL) and the truncated mutant MHC202 used in this study. Black box, TM domain; hexagon, site for N-linked glycosylation; SPase, signal peptidase. The lower panel shows the crystal structure of the MHC ectodomain in complex with  $\beta$ 2-microglobulin ( $\beta$ 2m) taken from the atomic coordinates 3UTQ.pdb omitting the peptide ligand in the  $\alpha$ 1- $\alpha$ 2 groove. The region comprising MHC202 is highlighted in red and shown as bottom view (middle panel). Due to the C-terminal deletion of the  $\alpha$ 3 domain, a cluster of several hydrophobic residues is exposed in MHC202 as highlighted in orange in the surface representation of the bottom view (right panel).

Figure 1 continued on next page

*Figure 1 continued*

**(B)** Targeted siRNA screen identifies non-canonical ERAD components that contribute to MHC202 turnover in addition to the Hrd1 retrotranslocation complex. Heat map of MHC202 steady-state levels using siRNA pool #1 corresponding to Figure 1 – figure supplement 1A (n=1, see Supplementary file 1 for biological replicates). The threshold was set to at least three-fold change in MHC202 steady-state level. **(C)** MHC202 is stabilized in RHBDL4 knockout cells ( $\Delta$ RHBDL4) when compared to wild-type Hek293T cells (wt). Turnover was evaluated 24 h post-transfection of MHC202 by adding cycloheximide (CHX) and harvesting at the indicated time points. Western blot (WB) of three independent experiments were quantified and shown in the right panel (means  $\pm$  SEM, n=3; \*p  $\leq$  0.05, \*\*p  $\leq$  0.01; \*\*\*p  $\leq$  0.001 (two-way ANOVA). Inset bar graph shows MHC202 steady state level at time point t=0 (means  $\pm$  SEM, n=3; \*p  $\leq$  0.05 (Student's t-test)).  $\beta$ -actin was used as a loading control. **(D)** MHC202 is stabilized in Hrd1 knockout cells ( $\Delta$ Hrd1) for up to 24 h as analysed by metabolic label pulse-chase. RHBDL4 siRNA knockdown additionally stabilizes MHC202 significantly. The right panel shows the quantification of autoradiograms of three independent experiments (means  $\pm$  SEM, n=3, \*p  $\leq$  0.05 (two-way ANOVA)). **(E)** Hek293T cells were co-transfected with N-terminally FLAG-tagged MHC202 and either an empty vector (-), HA-tagged RHBDL4 (R4-HA) wt, or the catalytic inactive SA mutant. RHBDL4 generates an 18-kDa N-terminal cleavage fragment (open triangle) that is degraded by the proteasome as shown by increased steady-state level upon MG132 treatment (2  $\mu$ M) compared to vehicle control (DMSO). The ectopically expressed catalytic SA mutant competes with endogenous degradation pathways and stabilizes deglycosylated full-length MHC202 (filled circle).  $\beta$ -actin was used as a loading control. **(F)** GFP-tagged RHBDL4 (R4-GFP) co-immunoprecipitates FLAG-tagged MHC202, but not FLAG-tagged OS9. Filled triangle, glycosylated MHC202; filled circle, deglycosylated MHC202; IP, immunoprecipitation. Data information: For clarity, for panels C-E representative experiments of 3 independent replicates are shown.

170 To investigate whether RHBDL4 directly processes MHC202, we performed a cell-based  
171 rhomboid gain-of-function cleavage assay (Fleig et al., 2012). Consistent with such a direct  
172 role of rhomboid-catalyzed cleavage in MHC202 clearance, overexpression of RHBDL4 (wt)  
173 but not its catalytic inactive serine-144-alanine mutant (RHBDL4-SA) generated an N-  
174 terminal fragment with an apparent molecular weight of 18 kDa (Figure 1E). While only  
175 traces of this cleavage product were observed in vehicle-treated cells, inhibition of the  
176 proteasome with MG132 increased its steady-state level. This result indicates that RHBDL4  
177 generates an MHC202-cleavage fragment, which is dislocated into the cytoplasm for  
178 proteasomal degradation in an analogous manner as previously described for membrane-  
179 integral substrates (Fleig et al., 2012). Likewise, proteasome inhibition also stabilized  
180 deglycosylated full-length MHC202 (Figure 1E and Figure 1 – figure supplement 1E). Again,  
181 this shows that MHC202 is degraded by the canonical Hrd1 retrotranslocation route and an  
182 RHBDL4-dependent substrate clipping mechanism. Consequently, the full extent of RHBDL4  
183 activity can only be seen when the downstream clearance pathway for fragments is blocked.  
184 Interestingly, overexpression of the catalytic inactive SA mutant stabilized a deglycosylated  
185 form of MHC202 even in the absence of MG132. This observation suggests that in a  
186 dominant-negative manner, the RHBDL4-SA mutant traps a partially retrotranslocated form  
187 of MHC202, exposing the glycosylation site to the cytoplasmic N-glycanase, while MHC202  
188 is still bound to the rhomboid active site. A similar trapping effect was previously observed by  
189 overexpression of a mutant form of the rhomboid pseudoprotease Derlin1 (Greenblatt et al.,  
190 2011). Consistent with this model, the RHBDL4-SA-induced deglycosylated MHC202 species  
191 is not observed upon siRNA knockdown of N-glycanase (Figure 1 – figure supplement 1F).  
192 Furthermore, in a co-immunoprecipitation assay from Triton X-100-solubilized cells,

193 RHBDL4-SA co-purified the glycosylated as well as the deglycosylated MHC202, whereas  
194 ectopically expressed FLAG-tagged OS9 was not bound (Figure 1F).

195 *RHBDL4-catalyzed cleavage of MHC202 and p97-mediated extraction are coupled*

196 The observation that RHBDL4-SA functionally interacts with deglycosylated MHC202  
197 indicates that rhomboid-catalyzed cleavage and protein dislocation into the cytoplasm are  
198 linked. As the ER-integral metalloprotease ZMPSTE24 (Ste24 in yeast) has been shown to  
199 clear polypeptide chains that got stuck in the Sec61 translocon channel during post-  
200 translational translocation (Ast et al., 2016), we decided to analyse the localization of  
201 MHC202 relative to the ER lumen before cleavage. As shown above, Endo H analysis  
202 reveals that the RHBDL4-generated N-terminal MHC202 fragment is glycosylated (Figure 1 –  
203 figure supplement 1E), indicating that it is formed in the ER lumen. To also discriminate  
204 between a putative translocation intermediate with the C-terminus facing the cytoplasm and a  
205 fully translocated protein, we generated an MHC202 construct harbouring an additional  
206 glycosylation site (K197N) in the C-terminal region (Figure 2 – figure supplement 1A). We  
207 reasoned that only fully translocated MHC202 would be glycosylated at this site. Western  
208 blot analysis of MHC202-K197N co-expressed with RHBDL4 showed an Endo H-sensitive C-  
209 terminal fragment (Figure 2 – figure supplement 1A). Consistent results were obtained with  
210 an MHC202 mutant with a single C-terminal glycosylation site only (Figure 2 – figure  
211 supplement 1B), corroborating that RHBDL4 cleaves fully translocated MHC202. Consistent  
212 with this, RHBDL4 did not cleave an artificially designed ERdj3-GFP-chimera that clogs the  
213 Sec61 translocon (Figure 2 – figure supplement 1C) and which previously had been shown  
214 to be cleaved by ZMPSTE24 (Ast et al., 2016). To further prove that RHBDL4 deals with  
215 ERAD-L substrates, we performed a protease protection assay of isolated microsomes.  
216 While a certain fraction of MHC202 was accessible to the protease, the RHBDL4-generated  
217 cleavage fragment was protected, confirming that it is generated in the ER lumen (Figure  
218 2A). Consistent with this, we observed ER localization of MHC202 under RHBDL4  
219 knockdown conditions by immunofluorescence microscopy (Figure 2 – figure supplement 1D  
220 and E). Interestingly, co-expression of the RHBDL4 SA trapping mutant significantly  
221 increased the pool of protease accessible MHC202 (Figure 2A), supporting our model of a  
222 stalled retrotranslocation intermediate.

223

224 To reach the proteasome, RHBDL4-generated cleavage fragments have to be dislocated into  
225 the cytoplasm. For this purpose, RHBDL4 recruits p97 to the ER membrane via a conserved  
226 motif (termed VBM) at its cytoplasmic C-terminus (Fleig et al., 2012; Lim et al., 2016).  
227 Blocking this interplay leads to the accumulation of glycosylated RHBDL4-generated  
228 cleavage fragments in the ER fraction (Fleig et al., 2012). Consistent with this, the p97  
229 inhibitor CB-5083 (Anderson et al., 2015) stabilized the 18-kDa N-terminal MHC202 fragment



230 (Figure 2B). The addition of MG132 did not further increase recovery of the cleavage  
231 fragment, indicating that solely blocking p97 and consequent retention in the ER prevents  
232 RHBDL4 generated fragments from proteasomal clearance. Additionally, we replaced a  
233 conserved arginine in the VBM, which is required for the interaction with p97, with an alanine  
234 (R308A) (Lim et al., 2016). As shown for the p97 inhibitor treatment, co-expression of the  
235 RHBDL4-R308A mutant or an RHBDL4 deletion mutant lacking the entire binding motif  
236 (RHBDL4 $\Delta$ VBM) together with MHC202 results in the stabilization of the 18-kDa N-terminal  
237 MHC202 fragment (Figure 2 – figure supplement 1F). Together with the trapping of  
238 deglycosylated MHC202 with the RHBDL4-SA active site mutant, these results indicate that  
239 RHBDL4 interacts with MHC202 during retrotranslocation, thereby generating cleavage  
240 fragments that are released into the cytoplasm where they become degraded by the  
241 proteasome. Interestingly, we observed that deletion of the entire cytoplasmic domain of  
242 RHBDL4 harbouring a conserved ubiquitin-interacting motif does not prevent RHBDL4-  
243 mediated cleavage but also stabilizes deglycosylated MHC202 (Figure 2 – figure supplement  
244 1G). As combining this effect with the substrate trapping active site SA mutant leads to an  
245 additive stabilization of deglycosylated MHC202, we speculate that RHBDL4 also interacts  
246 with a certain fraction of its substrates in a non-proteolytic manner, as has recently been  
247 described for the bacterial rhomboid protease YqgP (Began et al., 2020). This shows a  
248 striking similarity to the derlin-mediated retrotranslocation along the Hrd1 pathway (Wu and  
249 Rapoport, 2018).

250

251

A

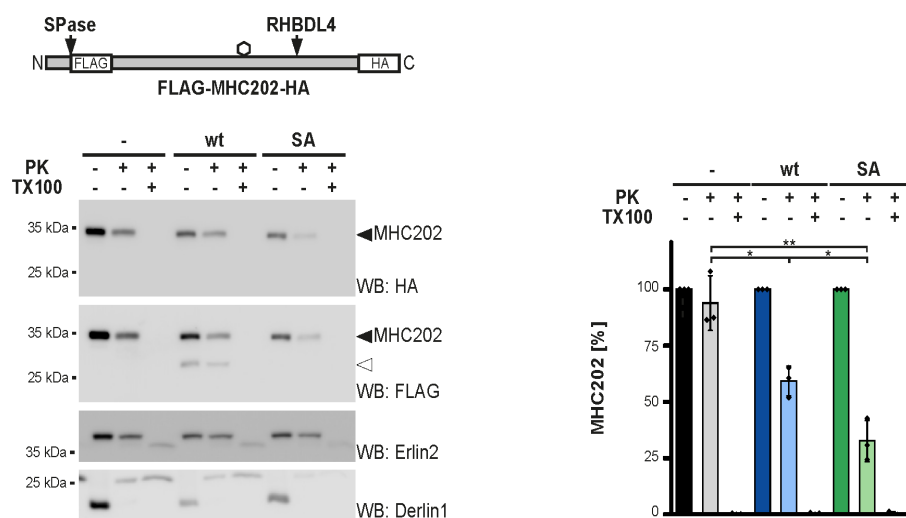

B

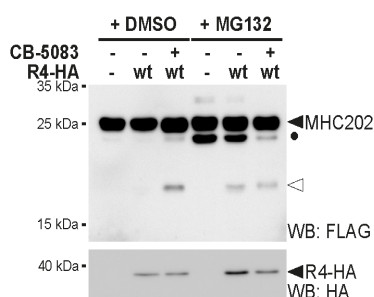

C

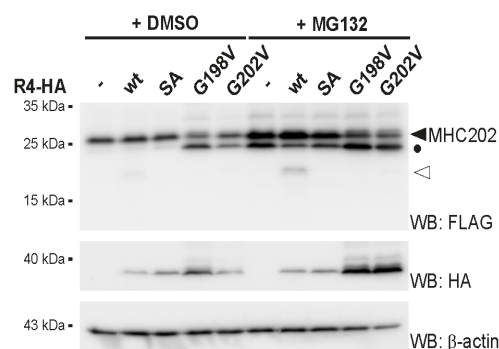

D

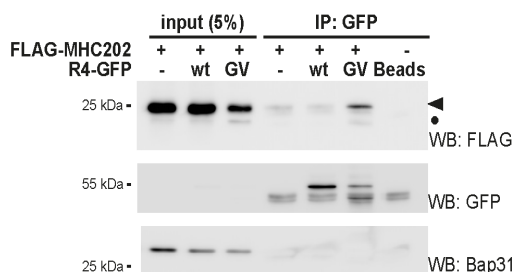

**Figure 2. RHBDL4 cleaves MHC202 retrotranslocation intermediate and p97 facilitates dislocation into the cytoplasm.**

(A) Accessibility of MHC202 to exogenous proteinase K (PK) was analysed in ER-derived microsomes. Hek293T cells were co-transfected with double-tagged HA-MHC202-FLAG and either an empty vector (-), RHBDL4 wild type (wt), or the catalytic inactive SA mutant. Hek293T-derived microsomes were incubated with PK and 1 % TritonX-100 (TX100) as indicated. R4-induced MHC202 cleavage product (open triangle) was protected from exogenous PK, whereas full-length MHC202 was partially accessible. Erlin2 (epitope in ER lumen) and Derlin1 (epitope in cytosol) were used as controls. Western blot (WB) HA signals of three independent experiments were quantified and are shown in the right panel (means  $\pm$  SEM,  $n=3$ ,  $*p \leq 0.05$ ;  $**p \leq 0.01$  (Student's t-test)). (B) Clearance of RHBDL4 generated cleavage product depends on p97, as shown by p97 inhibitor CB-5083 (2.5  $\mu$ M) induced stabilization of the N-terminal MHC202 fragment (open triangle) even in the absence of proteasome inhibitor MG132 (2  $\mu$ M). Likewise, CB-5083 reduced the appearance of the deglycosylated unprocessed form of MHC202 (filled circle) observed upon MG132 treatment, confirming that the Hrd1-dependent dislocation pathway depends on p97. Filled triangle, glycosylated MHC202; open triangle, 18-kDa N-terminal cleavage fragment. (C) C-terminal FLAG-tagged MHC202 is cleaved by HA-tagged RHBDL4 wt, but not by RHBDL4-G198V and RHBDL4-G202V mutants or the catalytic inactive SA mutant.  $\beta$ -actin was used as a loading control. Filled triangle, glycosylated full-length MHC202; filled circle, deglycosylated full length MHC202; open triangle, N-terminal cleavage fragment of MHC202. (D) GFP-tagged RHBDL4-G202V (GV) co-immunoprecipitates C-terminal FLAG-tagged MHC202. Filled triangle, glycosylated full-length MHC202; filled circle, deglycosylated full length MHC202; IP, immunoprecipitation. Bap31 was used as a negative control. Data information: For clarity, for panels A-D representative experiments of 3 independent replicates are shown.

252 Although the exact pseudoprotease mechanism in ERAD remains to be determined, previous  
253 work showed that mutation of a strictly conserved di-glycine motif (GxxxG) in TM helix 6 of  
254 the rhomboid fold leads to a dominant-negative substrate-trapping mutant of Derlin1  
255 (Greenblatt et al., 2011). Hence, we asked whether also the rhomboid-fold of RHBDL4  
256 directly contributes to the retrotranslocation of MHC202 and its cleavage fragments.  
257 Consistent with a mechanistic parallel to derlin-mediated retrotranslocation, co-expression of  
258 MHC202 with RHBDL4 mutants of the di-glycine motif, namely glycine-198-valine (G198V) or  
259 glycine-202-valine (G202V), induced deglycosylated MHC202 in the absence of MG132  
260 (Figure 2C). In agreement with interaction, immunoprecipitation of RHBDL4-G202V co-  
261 purified a substantial amount of MHC202, both in its glycosylated and deglycosylated form  
262 (Figure 2D). For both mutants, no MHC202 cleavage fragments were observed under  
263 proteasome inhibition (Figure 2C), indicating that also for RHBDL4, the GxxxG motif is critical  
264 for its activity. This had been observed for bacterial rhomboids before (Baker and Urban,  
265 2012). Consistent with what has been observed for the SA trapping mutant, co-expressing  
266 RHBDL4-G202V with MHC202 significantly increased its accessibility in a protease  
267 protection assay (Figure 2 – figure supplement 1H). Of note, mutating the GxxxG motif did  
268 not affect the interaction of RHBDL4 with p97 and its additional binding partners (Figure 2 –  
269 figure supplement 1I and see below), indicating that the protease forms its physiological  
270 complexes while in a dominant-negative manner stalling the retrotranslocation intermediates.  
271 Overall, these results reveal that RHBDL4 plays a previously unanticipated direct role in  
272 inducing retrotranslocation of the ERAD-L substrate MHC202 and its cleavage fragments.  
273 The exact molecular mechanism of how the rhomboid-fold of RHBDL4 contributes to  
274 retrotranslocation remains to be investigated.  
275

276 *RHBDL4 cleaves selected soluble ERAD-L substrates*

277 Next, we asked whether also other soluble ERAD-L substrates are processed in the cell-  
278 based RHBDL4 cleavage assay. However, neither NHK (Hosokawa et al., 2003) nor an ER-  
279 retained mutant of prolactin (PrI-KDEL) (Fleig et al., 2012) were processed by ectopically  
280 expressed RHBDL4 (Figure 3A). This suggests that RHBDL4 shows substrate specificity. As  
281 a follow-up, we tested two additional ERAD substrates resembling truncated type I  
282 membrane proteins, namely RI332, a deletion of ribophorin 1 (RPN1) (Tsao et al., 1992), and  
283 a loss-of-function splice variant of the  $\beta$ -secretase (BACE476 $\Delta$ ) (Tanahashi and Tabira,  
284 2007). BACE476 $\Delta$  was cleaved by ectopically expressed RHBDL4 leading to a 50-kDa  
285 fragment that appears between the glycosylated full-length 54-kDa form of BACE476 $\Delta$  and  
286 the MG132-stabilized 45-kDa deglycosylated species (Figure 3B and Figure 3 – figure  
287 supplement 1A). Interestingly, ectopic expression of RHBDL4 diminished the steady-state  
288 level of BACE476 $\Delta$  and completely depleted the MG132-sensitive deglycosylated full-length  
289 45-kDa species. This suggests that upon overexpression, RHBDL4 interacts with its  
290 substrates before they approach Hrd1 and thereby outcompetes the retrotranslocation of  
291 unprocessed BACE476 $\Delta$ . Consistent with a scenario of dislocating shorter, RHBDL4-  
292 generated BACE cleavage fragments into the cytoplasm, an overexposed western blot  
293 reveals a 40-kDa BACE-peptide in response to MG132 treatment (Figure 3B). Although we  
294 previously observed that degradation kinetics in Hek293T cells were unaffected by RHBDL4  
295 knockdown for RI332 (Fleig et al., 2012), processing of RI332 by an unknown ER protease  
296 had been observed before (Mueller et al., 2006). Consistently, co-expression of RI332 with  
297 RHBDL4 generated several RI332 fragments in the range of 25 to 35 kDa, whereas the SA  
298 mutant stabilized traces of deglycosylated unprocessed species as previously observed  
299 (Figure 3C and Figure 3 – figure supplement 1B). Remarkably, the type I membrane protein  
300 RPN1 is a native RHBDL4 substrate (Knopf et al., 2020). In addition to canonical cleavage in  
301 the TM region, RPN1 is cleaved at the same position as the truncated RI332 ERAD substrate  
302 (Figure 3 – figure supplement 1B). This indicates that substrate selection of soluble  
303 substrates occurs in a related manner to cleavage of membrane-anchored ectodomains.  
304 Taken together, these results show that in addition to unstable membrane-integral proteins  
305 (Fleig et al., 2012; Paschkowsky et al., 2018), RHBDL4 can selectively cleave some ERAD-L  
306 substrates.

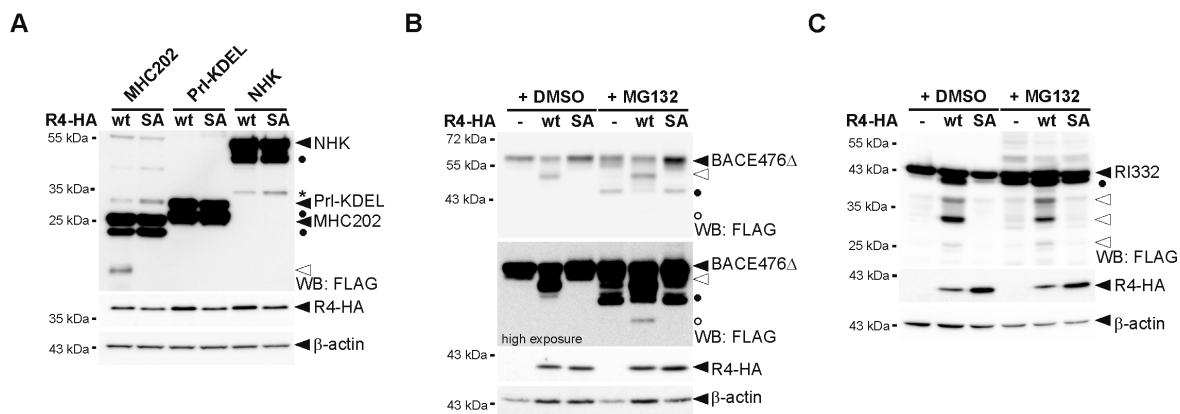

**Figure 3. RHBDL4 cleaves several but not all soluble ERAD-L substrates.**

**(A)** Cleavage of MHC202 is specific, as RHBDL4 does not lead to fragments for Pri-KDEL and NHK even when the proteasome is inhibited by MG132 (2  $\mu$ M). Hek292T cells were co-transfected with N-terminally FLAG-tagged MHC202, Pri-KDEL or NHK with either HA-tagged RHBDL4 (R4-HA) wild-type (wt) or the SA mutant and analyzed by western blotting (WB). Filled triangle, full-length glycosylated proteins; open triangle, MHC202 cleavage product; asterisk, RHBDL4 independent NHK degradation intermediate; filled circle, deglycosylated full-length proteins.  $\beta$ -actin was used as a loading control. **(B)** Hek293T cells were co-transfected with BACE476 $\Delta$  and either an empty vector (-), R4-HA wt, or the catalytic inactive SA mutant. RHBDL4 generates an N-terminal 40-kDa cleavage fragment (open triangle) that is degraded by the proteasome as shown by increased steady-state level upon MG132 treatment (2  $\mu$ M) compared to vehicle control (DMSO). In the presence of MG132 (2  $\mu$ M), the 34-kDa deglycosylated full-length BACE476 $\Delta$  (filled circle) and traces of a deglycosylated form of the RHBDL4-generated cleavage fragment (open circle) become visible.  $\beta$ -actin was used as a loading control. **(C)** Cleavage assay as in (B), but with N-terminally FLAG-tagged RI332 as substrate showing cleavage fragments in the range of 25 to 35 kDa (open triangles). Filled circle, deglycosylated full-length RI332.  $\beta$ -actin was used as a loading control. Data information: For clarity, for panels A-C representative experiments of 3 independent replicates are shown.

### 307 *Different determinants can trigger RHBDL4-catalyzed processing*

308 Next, we asked what requirements a protein has to fulfil to be recognized by RHBDL4. Since  
 309 FLAG-tagged full-length MHC class I heavy chain (MHC-FL, [Figure 4A](#)) was not cleaved by  
 310 RHBDL4 ([Figure 4B](#)), we asked whether triggering substrate ubiquitination would make it  
 311 prone for cleavage. Therefore, we took advantage of the fact that as part of an immune  
 312 evasion strategy, the human cytomegalovirus (HCMV) protein US11 targets MHC-FL  
 313 towards ERAD E3 ubiquitin ligases (Wiertz et al., 1996). However, even though US11  
 314 prompted a higher turnover of MHC-FL ([Figure 4 – figure supplement 1A](#)), co-expression of  
 315 RHBDL4 did not lead to any proteolytic processing by RHBDL4 ([Figure 4B](#)). This shows that  
 316 specific substrate features and not the general ubiquitination status and turnover rate  
 317 determine recognition by RHBDL4. As previous work demonstrated that a TM degron is  
 318 sufficient to induce RHBDL4-catalyzed cleavage (Fleig et al., 2012), we fused the luminal  
 319 part of MHC to the TM domain and cytosolic tail of a known RHBDL4 substrate, the  $\alpha$ -chain  
 320 of pre-T cell receptor (pT $\alpha$ ). Consistent with previous findings, the TM degron was sufficient  
 321 for RHBDL4-recognition (Fleig et al., 2012), leading to efficient processing of the MHC-pT $\alpha$   
 322 fusion protein ([Figure 4C](#)). In addition to two major cleavage sites in the context of the TM  
 323 region, we observed an 18-kDa fragment in the range of the MHC202 cleavage product.  
 324 These results show that the C-terminal truncation of MHC202 is not strictly required for

325 RHBDL4-catalyzed cleavage, and different determinants can lead to the same productive  
326 interaction with RHBDL4.

327

328 *RHBDL4 cleaves at a defined site, but additional features determine substrate selection*

329 Processing of the membrane-anchored MHC-pT $\alpha$  in the same region as MHC202 supports  
330 the notion that RHBDL4 preferentially cleaves at specific amino acid residues. For bacterial  
331 rhomboid proteases, a loose consensus sequence with small side chains at the scissile  
332 peptide bond has been shown to at least partially determine cleavage specificity (Strisovsky  
333 et al., 2009). Hence, we narrowed down the site of RHBDL4-catalyzed cleavage and then  
334 mutated small amino acids within this stretch to phenylalanines. For MHC202, cleavage by  
335 ectopically expressed RHBDL4 was abolished in a mutant with a deletion between amino  
336 acid 121 and amino acid 128 (Figure 4D). Within this stretch, four small amino acids are  
337 found in two pairs, namely glycine-121 (G121), cysteine-122 (C122), glycine-125 (G125) and  
338 serine-126 (S126). Only mutation of all four residues to phenylalanine (121FF,125FF)  
339 abolished cleavage completely, whereas mutating the second pair (125FF) partially reduced  
340 cleavage (Figure 4D). This result indicates that the major processing occurs at G125, but  
341 G121 provides an alternative cleavage site. Interestingly, G125 is located at a surface-  
342 exposed loop between two antiparallel  $\beta$ -sheets forming the hydrophobic interface of the  $\alpha$ 1-  
343  $\alpha$ 2-domains to the juxtamembrane  $\alpha$ 3-domain in full-length MHC, the latter which is deleted  
344 in MHC202 (Figure 1A and 4D). Of note, mutation of small residues in the MHC202 cleavage  
345 site region to proline, which for bacterial rhomboids has been shown to prevent the  
346 processing of the nearby peptide bond (Strisovsky et al., 2009), increased RHBDL4-  
347 catalyzed cleavage (Figure 4E). This was particularly pronounced in the glycine-121-proline,  
348 serine-126-proline double mutant (PP). For this mutant, which due to its unfolded state  
349 shows an apparent higher molecular weight on SDS-PAGE, at least three additional  
350 RHBDL4-induced cleavage products are detectable (Figure 4E). Since proline is predicted to  
351 break secondary structure elements, these results indicate that the cleavage site accessibility  
352 has a major impact on MHC202 processing by RHBDL4. Overall, we provide evidence that  
353 RHBDL4 substrate selection is a multi-layer process with sequence-specific recognition of  
354 the scissile peptide bond contributing to specificity, but the secondary structure and the  
355 overall protein stability playing a dominating role.

356

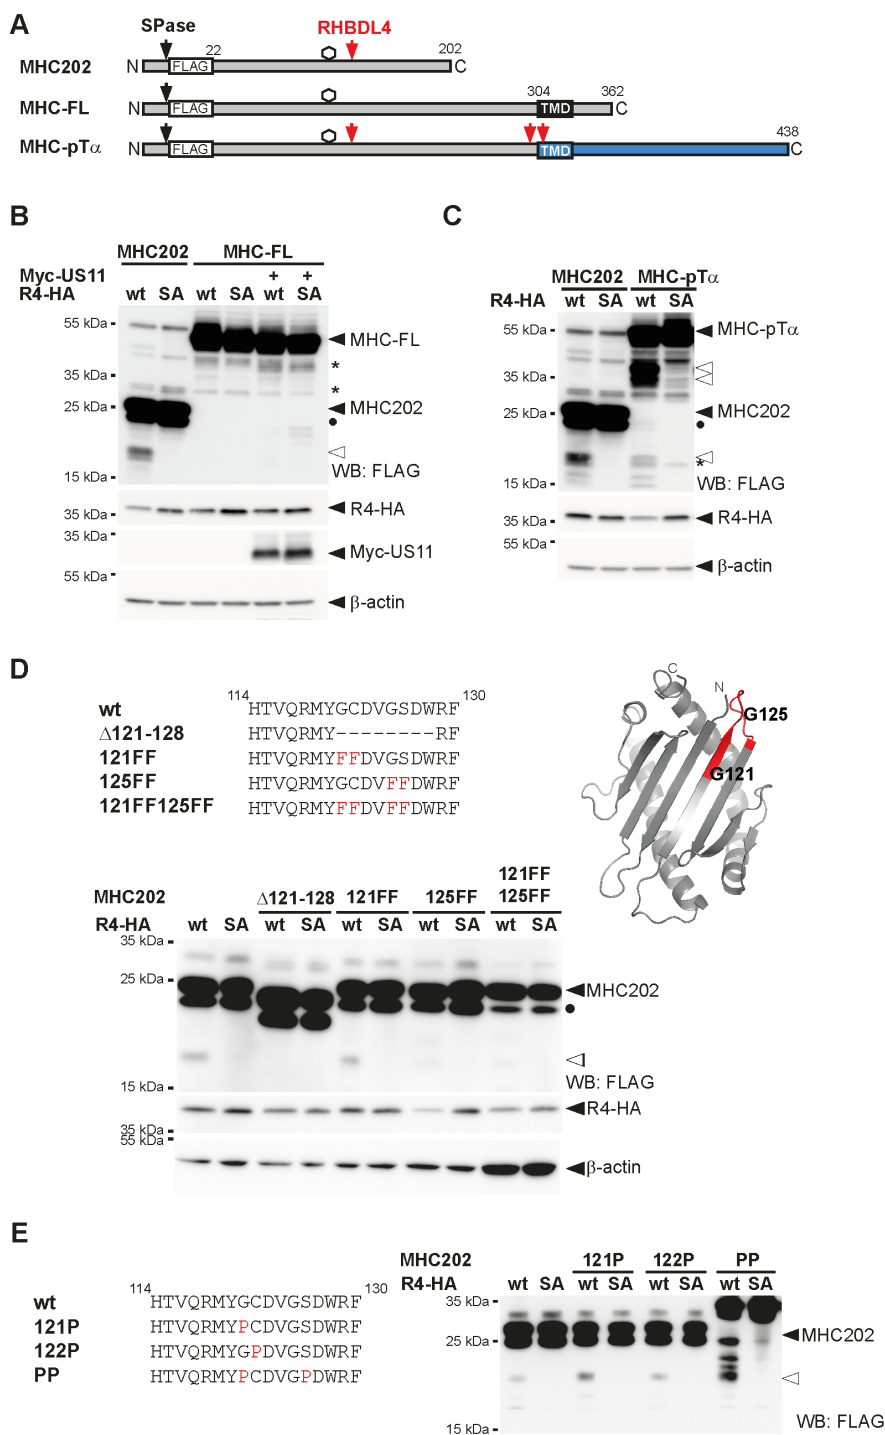

357 *The erlin ERAD complex interacts with RHBDL4 and MHC202*

358 As RHBDL4 did not primarily rely on the amino acid sequence for substrate selection, we  
359 wondered whether RHBDL4 assembles with other ERAD factors contributing to substrate  
360 recruitment. A critical step in analyzing membrane protein complexes is to combine efficient  
361 one-step affinity purification of proteins expressed at physiological levels. Therefore, we  
362 endogenously tagged RHBDL4 in Hek293T cells at its C-terminus with a single FLAG-tag  
363 using CRISPR/Cas12-mediated gene editing ([Figure 5 – figure supplement 1A and B](#))  
364 (Fueller et al., 2020). Hek293T cells expressing FLAG-tagged RHBDL4 were grown in  
365 medium supplemented with 'heavy' labelled amino acids, whereas the parenteral Hek293T  
366 cells were cultured in normal medium. Subsequently, the same number of cells were mixed,  
367 RHBDL4-FLAG was isolated from Triton X-100 solubilized microsomes, and co-purified  
368 interaction partners were identified by mass spectrometry ([Figure 5A](#)). The previously  
369 identified RHBDL4 cofactor p97 (Fleig et al., 2012) was 1.4-fold enriched, demonstrating the  
370 efficiency of this workflow. To identify core components of RHBDL4-dependent ERAD, we  
371 focused on proteins identified in all three replicates. Among the 20 proteins that showed  
372 enrichment in the RHBDL4-FLAG fraction greater than 1.4-fold were the chaperones BiP and  
373 calreticulin, two protein disulfide isomerases, namely PDI and Erp44, and both subunits of  
374 the regulatory glucosidase II ([Supplementary file 2](#)). Furthermore, a pair of two homologous  
375 membrane-integral ERAD factors, namely Erlin1 and Erlin2, were enriched by 1.5-fold. We  
376 reasoned that the luminal quality control factors are likely co-purified with bound RHBDL4  
377 substrates. With a focus on the erlins, we asked whether they are part of a functional  
378 membrane protein complex. Consistent with a stable assembly, co-immunoprecipitation and  
379 western blotting confirmed co-purification of RHBDL4 with Erlin1 and Erlin2 ([Figure 5B](#) and  
380 [Figure 5 – figure supplement 1C-E](#)). Erlin1 and Erlin2 were previously demonstrated to form  
381 a MDa-ERAD complex that among other clients is involved in the degradation of the IP(3)  
382 receptor (Huber et al., 2013; Inoue and Tsai, 2017; Pearce et al., 2009), suggesting that  
383 RHBDL4 functionally interacts with this ERAD sub-branch. The E3 ligase RNF170 previously  
384 shown to interact with the erlin complex was also co-purified with ectopically expressed  
385 RHBDL4 ([Figure 5 – figure supplement 1F](#)). Interestingly, Erlin2 showed stronger interaction  
386 with RHBDL4-GFP wt than the catalytic inactive SA mutant ([Figure 5 – figure supplement](#)  
387 [1D](#)). This result suggests that Erlin2 is not trapped by the SA mutant as would be the case  
388 for an RHBDL4 substrate. Hence, we may speculate that erlins play a role in substrate  
389 recruitment. As a putative substrate adaptor they may bind to RHBDL4 also in absence of a  
390 bound substrate but potentially dissociate from a trapped, stalled rhomboid-substrate  
391 complex. In accordance with a functional interplay of RHBDL4 with the erlin complex, blue  
392 native polyacrylamide electrophoresis (BN-PAGE) of immunisolated FLAG-tagged  
393 RHBDL4, both endogenously and ectopically expressed, showed distinct complexes in the



394 range of 250 kDa to 1.2 MDa, with Erlin2 co-purifying and co-migrating with the largest  
395 assembly ([Figure 5C](#) and [Figure 5 – figure supplement 1G](#)).

396

397 To test our hypothesis that erlins are substrate-adaptors for RHBDL4, we generated single  
398 and double Erlin1 and -2 knockout cells and tested the stability of MHC202 by cycloheximide  
399 chase. In order to block compensation by lysosome-based pathway such as ER-phagy  
400 (Molinari, 2021), we treated cells with the vacuolar ATPase-inhibitor bafilomycin A1 (BafA1)  
401 ([Figure 5 – figure supplement 1J](#)). Interestingly, knockout of Erlin1 leads to a reduced  
402 turnover of MHC202, whereas degradation of MHC202 was not significantly delayed upon  
403 Erlin2 knockout ([Figure 5D](#) and [Figure 5 – figure supplement 1H and I](#)). Since the erlins  
404 share high sequence similarity (Pearce et al., 2009), we hypothesized that knockout of one  
405 erlin protein could be compensated by the other one. Indeed, double knockout of Erlin1 and  
406 Erlin2 further slowed down the degradation of MHC202 ([Figure 5D](#)). Consistent with a direct  
407 role in recognizing RHBDL4 substrates, immunoprecipitation of Erlin1-HA or Erlin2-HA pulled  
408 down FLAG-tagged MHC202 but not the stable, secreted control protein Prl ([Figure 5E](#)).  
409 Altogether, these results show that RHBDL4 forms a MDa-complex with both Erlin1 and  
410 Erlin2 and that both erlins engage with the RHBDL4 substrate MHC202.

411

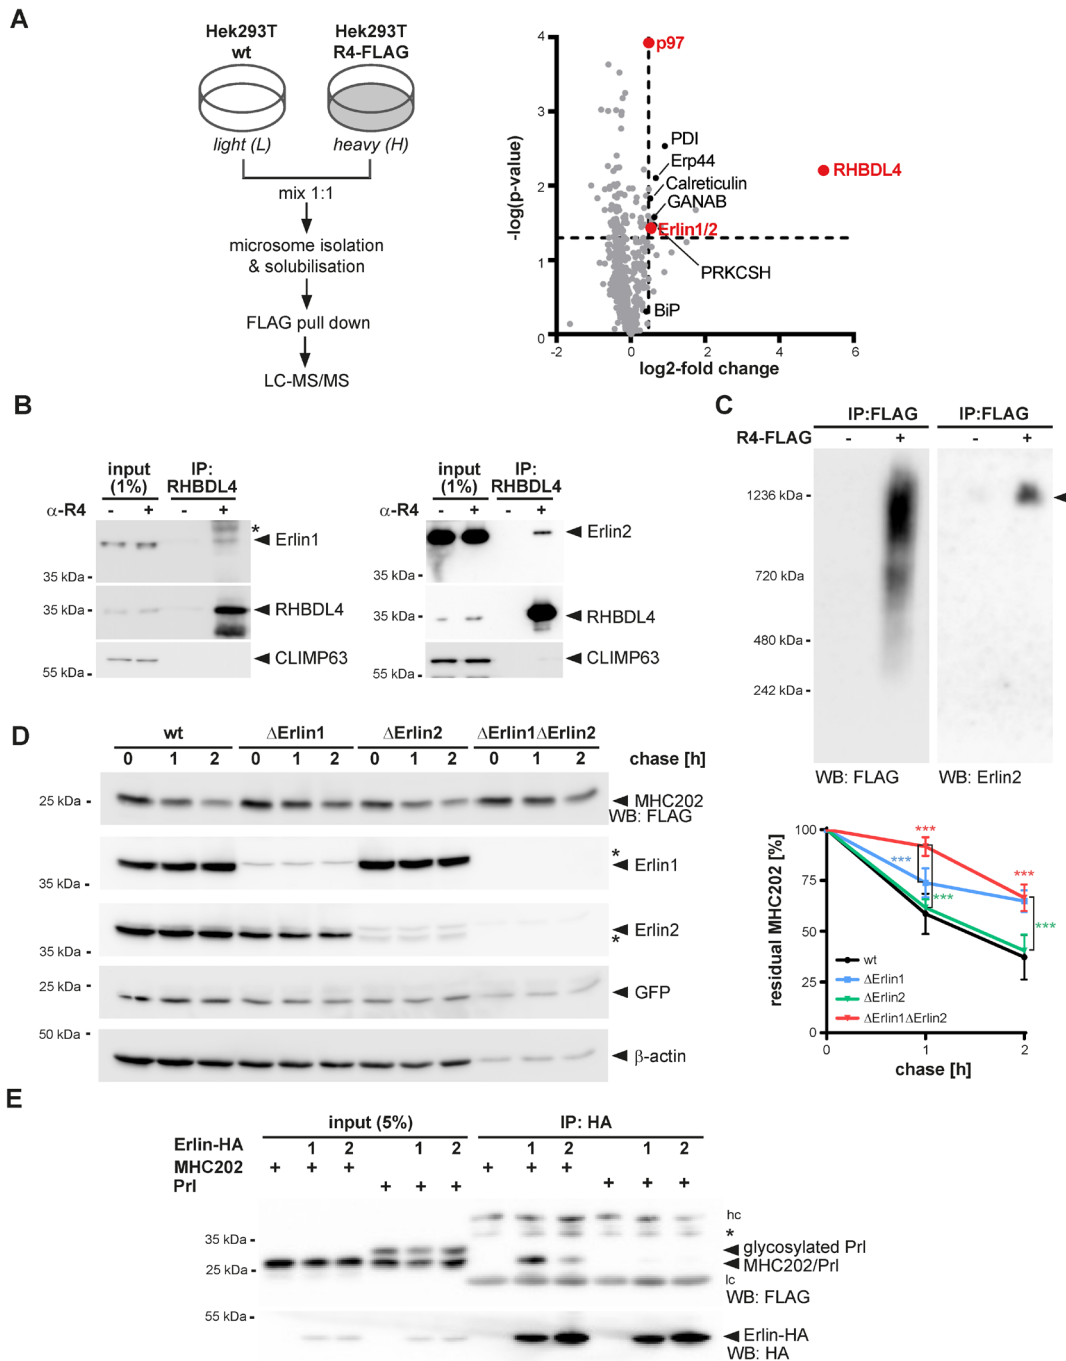

**Figure 5. The erlin ERAD complex interacts with RHBDL4 and MHC202.**

**(A)** SILAC-based mass spectrometry analysis of RHBDL4 interactome from Triton X-100-solubilized microsomes obtained from Hek293T cells with chromosomally FLAG-tagged RHBDL4 (Hek293T R4-FLAG) was performed as outlined. The right panel shows a volcano plot representation of potential RHBDL4 interaction partners identified in all three replicates. **(B)** Microsome fractions of Hek293T cells were solubilized with 1% Triton X-100 and endogenous RHBDL4 was isolated by immunoprecipitation (IP). Western blotting (WB) identifies co-purification of endogenous Erlin1 and Erlin2. CLIMP63 was used as a negative control. Asterisk indicates an unspecific band. **(C)** RHBDL4 is part of an MDa-sized erlin complex. Hek293T cells transfected with empty vector (-) or FLAG-tagged RHBDL4 (R4-FLAG) were solubilized with 1% Triton X-100, immunoprecipitated for FLAG, eluted with FLAG peptides and analyzed by BN-PAGE. RHBDL4-FLAG formed several higher molecular weight complexes in addition to the 1.2 MDa complex containing Erlin2 (filled triangle). **(D)** MHC202 degradation is delayed in Erlin1 Hek293T knockout cells ( $\Delta$ Erlin1) compared to wild-type Hek293T cells (wt), as shown by cycloheximide (CHX) chase. To block potential compensation by ER-phagy, cells were pretreated with 100 nM BafA1 for 3h. In Erlin1/Erlin2 Hek293T double knockout cells ( $\Delta$ Erlin1 $\Delta$ Erlin2), MHC202 is significantly stabilized compared to parental Hek293T cells. To ensure homogenous expression of MHC202 within each cell line, GFP expressed from a downstream internal ribosome entry site (IRES) and endogenous  $\beta$ -actin were used as controls. Asterisks indicate cross-reacting Erlin1 and Erlin2 signals. WB quantification of four independent experiments is shown in the right panel (means  $\pm$  SEM,  $n=4$ ,  $***p \leq 0.001$  (two-way ANOVA)). **(E)** HA-tagged Erlin1 (1) and Erlin2- (2) specifically interact with MHC202 but not with prolactin (Prl). Hc, heavy chain; lc, light chain; asterisk, unspecific band. Data information: For clarity, for panels B-E representative experiments of 3-4 independent replicates are shown.

412 *RHBDL4 facilitates the removal of aggregation-prone ERAD-L substrates*

413 In addition to canonical ERAD, Erlin2 was shown to act as a chaperone on the artificially  
414 designed, ER-targeted protein termed ER-beta (ER $\beta$ ) (Figure 6 – figure supplement 1A),  
415 which like MHC202 is aggregation-prone (Vincenz-Donnelly et al., 2018). As Erlin2 and  
416 RHBDL4 are part of one complex, we wondered whether RHBDL4 also interacts with and  
417 degrades ER $\beta$ . Indeed, the catalytic inactive SA mutant of RHBDL4 traps ER $\beta$  resulting in  
418 co-immunoprecipitation of ER $\beta$  with RHBDL4-SA but not wt (Figure 6A). This mirrors the  
419 behaviour of RHBDL4 substrates like MHC202 (Figure 1E) or pT $\alpha$  (Fleig et al., 2012).  
420 Consistent with this, knockdown of RHBDL4 increased the ER $\beta$  steady-state level (Figure 6 –  
421 figure supplement 1B). Furthermore, co-expression of RHBDL4 wt with ER $\beta$  increases the  
422 generation of a C-terminal cleavage fragment (Figure 6B). This raised the question of  
423 whether RHBDL4 might be of general importance for the turnover of aggregation-prone  
424 peptides. Interestingly, the disease-associated, aggregation-prone Aguadilla variant of the  
425 fibrinogen  $\gamma$ -chain harbouring the arginine-375-tryptophane (R375W) substitution (Brennan et  
426 al., 2002; Kruse et al., 2006) was cleaved four times more compared to the  $\gamma$ -chain wt (Figure  
427 6C). This indicates that, despite an almost unchanged amino acid sequence, the biophysical  
428 property of an aggregation-prone ERAD-L substrate likely targets  $\gamma$ -fibrinogen into the  
429 RHBDL4-dependent ERAD clipping pathway. Consistent with this, knock out of Erlin1 and  
430 Erlin2 leads to a significant increase of the steady-state level of  $\gamma$ -fibrinogen-R375W (Figure  
431 6 – figure supplement 1B).

432  
433 In order to determine the impact of RHBDL4 on clearance of aggregation-prone species of  
434 ERAD-L substrates, we analyzed the Nonidet P40 (NP40)-insoluble fraction by western  
435 blotting (Valetti et al., 1991). In addition to increasing the steady-state level of MHC202,  
436 knockdown of RHBDL4 also increases the level of MHC202 recovered in the NP40 insoluble  
437 fraction (Figure 6D) but not for a truncated version of MHC202 (MHC121), corresponding to  
438 the RHBDL4-generated N-terminal cleavage fragment. MHC121 is not recovered in the  
439 NP40 insoluble fraction even upon RHBDL4 knockdown (Figure 6E). Of note, this further  
440 truncated version of MHC121 is rapidly degraded so that we used Hrd1 knockout cells for this  
441 assay. Consistent increase of NP40 insoluble protein aggregates upon knockdown of  
442 RHBDL4 were also observed for the aggregation-prone ERAD-L substrates ER $\beta$ ,  $\gamma$ -fibrinogen  
443 wt and the R375W mutant (Figure 6 – figure supplement 1C-E). Taken together, these  
444 results indicate that RHBDL4-catalyzed cleavage prevents self-aggregation of MHC202 and  
445 other ERAD-L substrates. The molecular mechanism of how the RHBDL4-erlin complex  
446 recognizes aggregation-prone protein conformations and how RHBDL4-catalyzed clipping

447 facilitates dislocation into the cytoplasm are essential questions that remain to be solved in  
 448 the future.

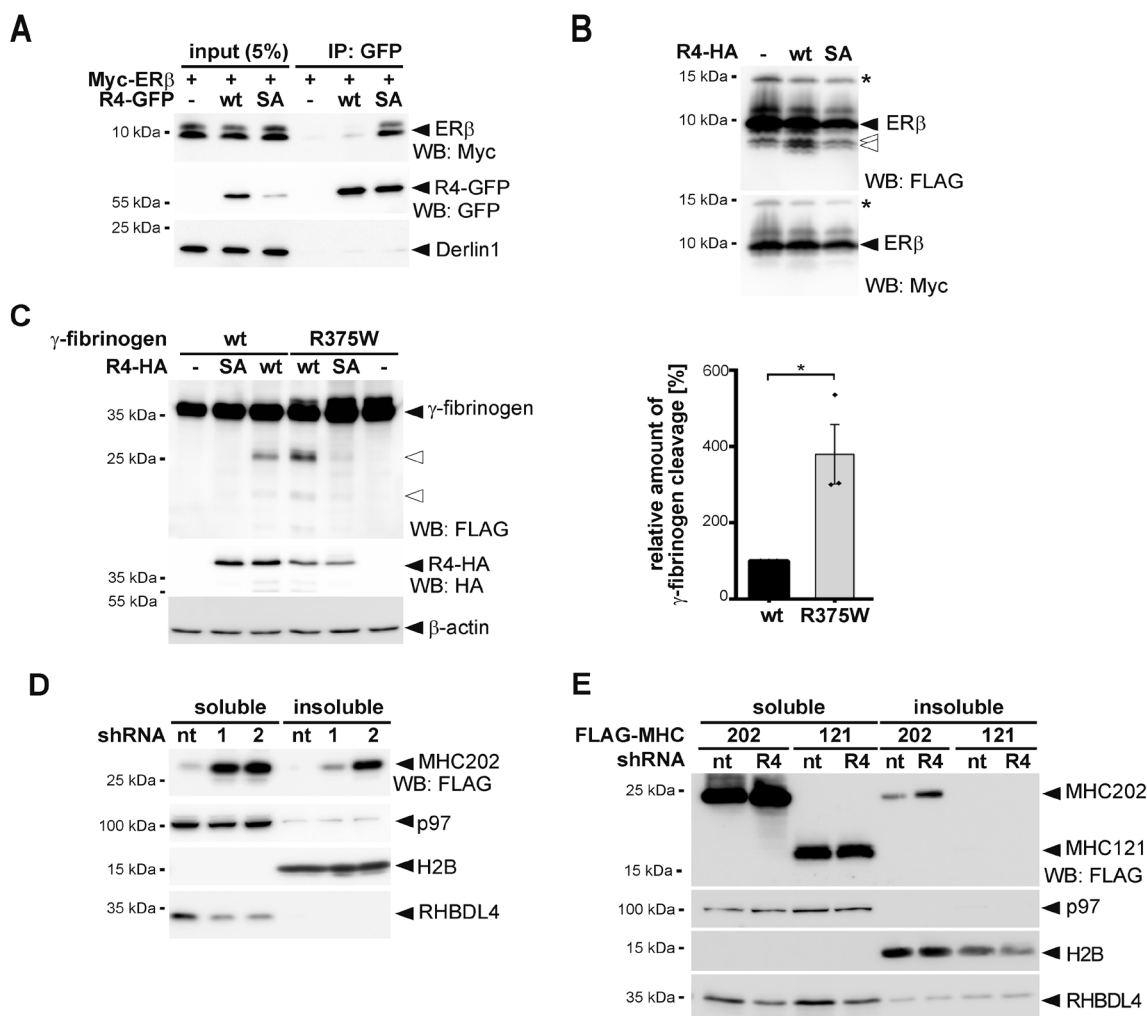

**Figure 6. RHBDL4 reduces the burden of aggregation-prone ERAD-L substrates.**

(A) The aggregation-prone model protein ER-beta (ERβ) harbouring an N-terminal Myc tag interacts with the catalytic SA mutant of GFP-tagged RHBDL4 (R4-GFP) as shown by immunoprecipitation (IP), whereas no interaction is observed for the wild-type (wt) construct. WB, western blotting. (B) ERβ harbouring an N-terminal Myc-tag and a C-terminal FLAG-tag was co-expressed with HA-tagged RHBDL4 (R4-HA) as indicated. Tris-bicine-urea SDS PAGE and western blot (WB) analysis reveal at least two C-terminal cleavage fragments (open arrows) along with full-length ERβ and an undetermined post-translational modification (star). (C) A mutation in fibrinogen α-chain (R375W) that increases the aggregation propensity also increased generation of two N-terminal fragments (open arrows) by ectopically expressed HA-tagged RHBDL4 (R4-HA) in Hek293T cells. β-actin was used as a loading control. Western blot quantification of three independent experiments is shown in the right panel (means ± SEM, n=3, \*p ≤ 0.05 (Student's t-test)). (D) MHC202 steady-state levels were analysed in Hek293T cells transfected with two independent shRNAs targeting RHBDL4 (R4-1 and R4-2) or non-targeting control (nt) followed by NP40 lysis and WB analysis of the soluble and detergent-insoluble fraction. p97 was used as a loading control for the soluble fraction and H2B for the insoluble fraction. (E) MHC121 mimicking the RHBDL4-generated N-terminal cleavage fragment was not recovered in the NP40 insoluble fraction, in contrast to MHC202, upon RHBDL4 shRNA knockdown (R4) compared to non-targeting control (nt) in Hrd1 knockout cells. p97 was used as a loading control for the soluble fraction and H2B for the insoluble fraction. Data information: For clarity, for panels A-E representative experiments of three independent replicates are shown.

## 449 Discussion

450 Protein aggregation in cells is an abnormal condition associated with ageing and human  
451 disorders ranging from diabetes to neurodegeneration (Labbadia and Morimoto, 2015; Reis-  
452 Rodrigues et al., 2012). While multiple safeguards are known to cope with cytoplasmic  
453 protein aggregates (Koga et al., 2011; Mogk et al., 2018), little is known about pathways that  
454 clear aggregating proteins from the ER lumen. Our results show that the rhomboid protease  
455 RHBDL4 contributes to the turnover of soluble, aggregation-prone ERAD-L substrates. While  
456 this substrate class is commonly degraded through a Sel1, Hrd1, and derlin-dependent  
457 retrotranslocation route (Christianson and Ye, 2014; Ruggiano et al., 2014), aggregation-  
458 prone conformations of the same substrates may be targeted by the erlin complex to  
459 RHBDL4 for cleavage (Figure 7). We suggest that this rhomboid-catalyzed clipping  
460 mechanism may facilitate protein turnover by generating shorter fragments that are more  
461 easily dislocated into the cytoplasm for proteasomal degradation. Under conditions when  
462 RHBDL4-dependent ERAD is compromised, or the substrate-load exceeds its capacity,  
463 various ERAD-L substrates aggregate, highlighting the importance of this proteostasis  
464 mechanism.

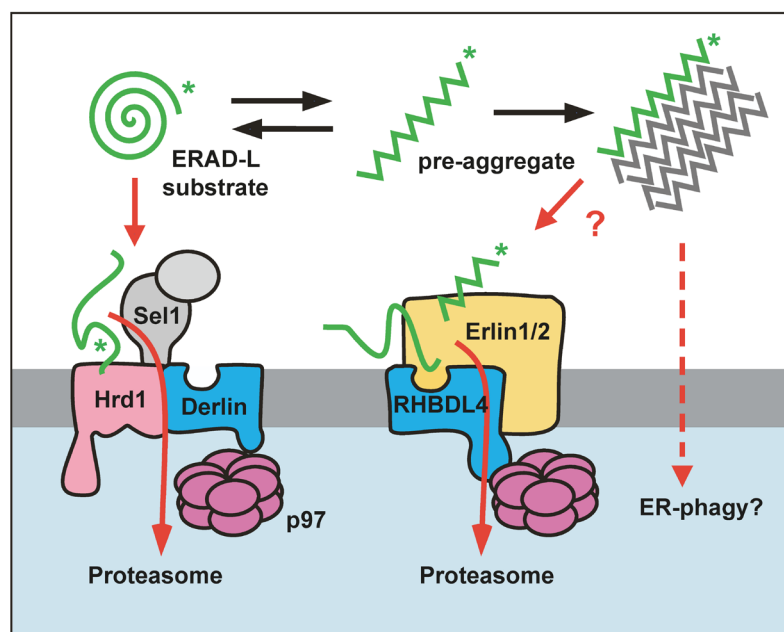

**Figure 7. Model for RHBDL4-erlin-mediated clearance of pre-aggregates.**

Monomeric ERAD-L substrates are predominantly degraded through the canonical Sel1, Hrd1 and derlin-dependent retrotranslocation pathway, whereas the erlin complex targets aggregation-prone conformations to RHBDL4. RHBDL4-catalyzed clipping facilitates retrotranslocation of cleavage fragments in a process that is reminiscent to the derlin-induced recognition by Hrd1 and derlins. Upon increasing their concentration, pre-aggregated ERAD-L substrates form oligomers that may become disassembles and presented for RHBDL4-catalyzed cleavage by erlins. Large, macroscopic aggregates cannot be targeted to the ERAD pathway and may become subject to ER-phagy.

465

466 *RHBDL4 binds erlins to target aggregation-prone ERAD-L substrates for degradation*  
467 Biochemical analysis suggests that rhomboid proteases do not need any invariant subunit  
468 and may act as single-chain proteases (Lemberg et al., 2005; Urban and Wolfe, 2005). This  
469 is a striking difference to the aspartic intramembrane protease presenilin, which in order to  
470 become active has to assemble with three invariant subunits, Nicastrin, PEN2 and APH1,  
471 forming the  $\gamma$ -secretase complex (Edbauer et al., 2003; Kimberly et al., 2003; Takasugi et al.,  
472 2003). Here, we reveal by shotgun proteomics of genomically tagged RHBDL4 and validating  
473 by western blot analysis that the two putative substrate recruitment factors Erlin1 and Erlin2  
474 (Pearce et al., 2007; Pearce et al., 2009) are in a native complex with RHBDL4. A previous  
475 proximity proteomics approach did not reveal significant interaction of RHBDL4 to membrane  
476 integral components (Ikeda and Freeman, 2019). However, the study by Ikeda and Freeman  
477 used a BirA fused to RHBDL4's C-terminal tail that likely does not get in proximity to erlins  
478 that lack any prominent cytoplasmic portion (Pearce et al., 2009). In the light of our analysis  
479 of the native RHBDL4 interactome and a recent study on the mitochondrial rhomboid  
480 protease PARL (Wai et al., 2016), we may now speculate that also rhomboids form higher-  
481 order assemblies. The RHBDL4 complex shows a striking parallel to another intramembrane  
482 protease involved in ERAD: the aspartic protease SPP (signal peptide peptidase), which also  
483 forms several higher-order assemblies with specific ERAD components (Chen et al., 2014;  
484 Stagg et al., 2009). Our BN-PAGE analysis revealed several RHBDL4 containing complexes  
485 after solubilization with Triton X-100. This includes an assembly >1 MDa containing  
486 endogenous Erlin2. Previous work has shown the interaction of erlins with ERAD substrates  
487 as diverse as the IP(3) receptor (Lu et al., 2011; Pearce et al., 2007; Pearce et al., 2009) and  
488 the artificially designed aggregation-prone luminal peptide ER $\beta$  (Vincenz-Donnelly et al.,  
489 2018). Intriguingly, the erlin complex is predicted to form an assembly similar to chaperonins,  
490 albeit without ATPase activity and was hypothesized to bind hydrophobic stretches that are a  
491 hallmark for aggregating proteins (Pearce et al., 2009). The interplay of erlin-mediated  
492 recognition and RHBDL4-catalyzed clipping may help to lower protein aggregation in the ER  
493 lumen (Vincenz-Donnelly et al., 2018). While globular misfolded proteins are primarily  
494 targeted to the canonical Hrd1 pathway (Christianson and Ye, 2014; Ruggiano et al., 2014),  
495 aggregation-prone peptide conformations may be recognized by targeted towards the  
496 RHBDL4-erlin complex (Figure 7). Interestingly, erlins are members of the SPFH (stomatin,  
497 prohibitin, flotillin, HfC/K) family that also include Stomatin-like protein 2 (SLP2) (Browman et  
498 al., 2007; Browman et al., 2006). SLP2, in turn, was shown to assemble in a 2-MDa complex  
499 with the mitochondrial rhomboid protease PARL and the *i*-AAA-protease YME1L, where  
500 SLP2 is thought to regulate PARL-catalyzed intramembrane proteolysis (Wai et al., 2016).  
501 Despite this striking similarity, it remains to be seen whether erlins comparably control  
502 RHBDL4 activity. Considering that prohibitins, the closest relatives of erlins, form higher

503 molecular weight complexes regulating *m*-AAA proteases (Steglich et al., 1999) this could  
504 likely be a mechanism shared by several proteases linked to proteostasis control.

505

#### 506 *Recognition of ERAD-L substrates by the membrane-integral rhomboid active site*

507 The crystal structures of the *Escherichia coli* rhomboid protease GlpG revealed the active  
508 site to be located several Ångstroms beneath the membrane surface, in the centre of a six  
509 TM helix-bundle (Wang et al., 2006). A combination of structural and biochemical studies on  
510 bacterial rhomboids provided evidence for a lateral lipid-embedded substrate gate and a  
511 surface-exposed active site opening, which is temporally shielded by a flexible loop structure  
512 (for review see (Lemberg and Strisovsky, 2021)). While helical, lipid-embedded substrate TM  
513 segments are thought to unfold into the active site via the membrane-embedded lateral gate  
514 (Cho et al., 2016), it is conceivable that for RHBDL4, the surface-active site opening allows  
515 ERAD-L substrates lacking any TM anchor to enter the active site from the ER lumen. In a  
516 related manner, we and others observed rhomboid cleavage within ectodomains and loops of  
517 membrane proteins (Fleig et al., 2012; Knopf et al., 2020; Maegawa et al., 2007;  
518 Paschkowsky et al., 2018) and *in vitro* detergent-solubilized rhomboids are known to cleave  
519 soluble model substrates (Arutyunova et al., 2018; Wang et al., 2006). Overall, at least two  
520 different substrate recognition routes emerge for RHBDL4: one for membrane proteins and  
521 one for soluble ERAD-L substrates, which both lead to clipping and subsequent degradation  
522 by the proteasome.

523

#### 524 *Rhomboid-fold as a conserved feature in retrotranslocation*

525 The here observed cleavage of a soluble ERAD-L substrate may be an analogue to the  
526 interaction of derlins with ERAD-L substrates during Hrd1-mediated retrotranslocation (Wu et  
527 al., 2020). While Der1 in yeast is specific for soluble substrates (Carvalho et al., 2006; Denic  
528 et al., 2006) and a second derlin Dfm1 only deals with membrane proteins (Neal et al., 2018),  
529 RHBDL4 and mammalian derlins may act on both membrane-integral and soluble substrates.  
530 Although the exact mechanism of retrotranslocation remains to be determined, recent cryo-  
531 EM structures of ERAD complexes have revealed first insights (for review see (Lemberg and  
532 Strisovsky, 2021)). Most prominently, a structural model of the yeast Hrd1 complex indicates  
533 that the ERAD-L substrates are inserted into the plane of the membrane via the rhomboid  
534 fold of Der1 and pass the lipid bilayer in between two half-channels formed by Hrd1 and  
535 Der1, respectively (Wu et al., 2020). Molecular dynamics simulation and comparison to  
536 previous work on the bacterial rhomboid GlpG suggest that this energetically unfavoured  
537 event is facilitated by a lipid thinning effect induced by both, Hrd1 and Der1. Our observation  
538 that several RHBDL4 mutants stabilize uncleaved substrates while they are looped into the  
539 cytoplasm indicates that also RHBDL4 contributes to retrotranslocation. Strikingly, mutations

540 of the conserved GxxxG motif in human Derlin-1 revealed a very similar dislocation  
541 intermediate (Greenblatt et al., 2011). For RHBDL4 the default pathway appears to be  
542 substrate clipping and retrotranslocation of cleavage fragments. However we hypothesize  
543 that based on its homology to Der1, in concert with other ERAD factors RHBDL4 may also  
544 contribute in a non-proteolytic manner to protein dislocation into the cytoplasm. Similarly, the  
545 bacterial rhomboid protease YggP has both a proteolytic function and acts as a  
546 pseudoprotease when it recruits conformational variants of a membrane transporter to the  
547 AAA-protease FtsH for degradation (Began et al., 2020). The parallel of bacterial rhomboid  
548 proteases in membrane protein quality control (Began et al., 2020; Liu et al., 2020) to derlins  
549 and RHBDL4 in ERAD suggests that rhomboid family proteins represent an ancient  
550 proteostasis factor (Knopf and Lemberg, 2020). While initially evolved as proteases, certain  
551 rhomboids like the derlins may have lost their catalytic activity during eukaryotic evolution.  
552 We may speculate that they retained their role in recognising aberrant proteins, but the  
553 ubiquitin-proteasome system took over the degradation function. Hence, RHBDL4, with its  
554 serine intramembrane protease active site, may be seen as an ancestral form still combining  
555 the protease and pseudoprotease mechanism.

556

#### 557 *A role of RHBDL4 in aggregate removal*

558 Aggregates are higher molecular structures commonly no longer soluble in nonionic  
559 detergents (Valetti et al., 1991). Seen from this angle, the increase of NP40-insoluble  
560 MHC202 under RHBDL4 knockdown first shows that MHC202 tends to aggregate and  
561 second, it suggests that RHBDL4 is important for the removal of aggregation-prone proteins.  
562 The role of RHBDL4 in clipping aggregation-prone ERAD-L substrates is corroborated by our  
563 finding that the Aguadilla mutant of fibrinogen  $\gamma$ -chain, predestined to form aggregates (Kruse  
564 et al., 2006), is cleaved four times more than the wt protein. Likewise, we observed that the  
565 aggregation-prone model protein ER $\beta$  functionally interacts with RHBDL4. Altogether, these  
566 results suggest that RHBDL4, in cooperation with the erlin complex, cleaves and thereby  
567 induces the degradation of aggregation-prone ERAD-L substrates. For the substrates  
568 analyzed within our study, this affects only a small fraction that may start aggregating with a  
569 lag phase of several hours, while the initial fast turnover is dominated by Hrd1-mediated  
570 retrotranslocation. In contrast, given the limited dimension of the Hrd1 complex (Wu et al.,  
571 2020) or any other putative alternative retrotranslocon depending on RHBDL4, macroscopic  
572 protein aggregates might be removed by ER-phagy or a vesicle-based lysosomal  
573 degradation route (Figure 7) (Fregno et al., 2018; Fu and Sztul, 2009). Hence, in addition to  
574 controlling the integrity of the membrane proteome as previously described (Fleig et al.,  
575 2012), RHBDL4 serves as an important fail-safe mechanism for ER luminal protein  
576 homeostasis by lowering the concentration of aggregation-prone luminal ERAD-L substrates.



577 Further insights into RHBDL4 complex composition and identification of additional  
578 endogenous substrates likely will unveil important cellular mechanisms. These insights will  
579 be indispensable to utilize the capacity of RHBDL4 in pre-aggregate removal for therapeutic  
580 application.

## 581 **Materials and Methods**

### 582 *Plasmids and RNA interference*

583 Unless otherwise stated, all constructs were cloned into pcDNA3.1+ (Invitrogen). Construct  
584 encoding human RHBDL4 with an N-terminal triple HA-tag and C-terminal GFP-tag have  
585 been described previously (Knopf et al., 2020). Constructs for HA-tagged human RHBDL4-  
586  $\Delta$ C and RHBDL4- $\Delta$ VBM were cloned by subcloning residues 1 to 268 ( $\Delta$ C) and residues 1 to  
587 300 ( $\Delta$ VBM), respectively (Fleig et al., 2012). For generating point mutants, a site-directed  
588 mutagenesis strategy was used. For affinity purification by immunoprecipitation and peptide  
589 elution, a C-terminal single FLAG-tagged mouse RHBDL4 was cloned (Fleig et al., 2012).  
590 Plasmids encoding triple FLAG-tagged RI332, secreted human prolactin and Pri-KDEL were  
591 described previously (Fleig et al., 2012). A truncated 202-amino acid long version of human  
592 MHC class I heavy chain A2 (UniProt ID O78126) with a C-terminal FLAG-tag was cloned  
593 into pCMV-S11 (Sandia BioTech). N-terminal triple FLAG-tagged versions of MHC-FL,  
594 MHC202 (comprising residues 21 to 202 of the MHC ORF), OS9 (UniGene ID Hs. 527861,  
595 IMAGE:2964645), NHK (gift from R. Kopito), BACE476 $\Delta$  (gift from M. Molinari), fibrinogen  $\gamma$ -  
596 chain wt and -R375W (gift from J. Brodsky) were generated by subcloning the respective  
597 open reading frames omitting their signal sequences into a pcDNA3-based expression vector  
598 containing a signal sequence fused to a triple FLAG-tag (Fleig et al., 2012). For  
599 cycloheximide experiments, the N-terminal triple FLAG-tagged version of MHC202 was  
600 subcloned into pCDH-IRES-GFP (Meissner et al., 2011). The glycosylation mutants  
601 MHC202-K197N and MHC202-N100Q-K197N were cloned with a C-terminal triple FLAG-tag  
602 followed by an S-tag. The MHC-pT $\alpha$  chimera was generated by overlap extension PCR,  
603 fusing residues 22-304 of MHC-FL to the TM domain and C-terminus of pT $\alpha$  (residues 147-  
604 281). For stable expression, FLAG-MHC202 was subcloned into pcDNA5/FRT/TO  
605 (Invitrogen). Myc-tagged HCMV strain AD169 US11 (UniProt ID P09727) was ordered after  
606 codon optimization as gBlock (IDT) and cloned into pcDNA3.1+. Constructs encoding GFP-  
607 tagged ERdj3-GFP-3Gly (gift from M. Schuldiner) (Ast et al., 2016), FLAG-tagged RNF170,  
608 HA- and FLAG-tagged human Erlin1 and Erlin2 (gift from R. Wojcikiewicz) (Pearce et al.,  
609 2007; Pearce et al., 2009) and Myc-tagged ER $\beta$  (gift from M. Hipp) (Vincenz-Donnelly et al.,  
610 2018), the ER marker RFP-KDEL (Altan-Bonnet et al., 2006) were described previously. For  
611 cleavage assays, ER $\beta$  was cloned with an N-terminal Myc and a C-terminal triple FLAG-tag  
612 into pcDNA3.1. To rescue Hrd1 in Hrd1 knockout cells, untagged Hrd1 was generated by  
613 subcloning the respective open reading frame (UniProt ID Q86TM6-3) into a pcDNA3-based  
614 expression vector. For transient knockdown, the small hairpin (shRNA)-expressing vectors  
615 pSUPER.neo (R4-1) (Fleig et al., 2012) and a pRS vector-based construct targeting 5'-  
616 ATGAGGAGACAGCGCTTCACAGATTCGA-3' (R4-2) (OriGene) were used. As non-  
617 targeting (nt) control pSUPER.neo targeting 5'-ACAGCUUGAGAGAGCUUUA-3' designed

618 for knockdown of RHBDL4 in COS7 cells (but not human cells) was used. For generating  
619 single guide (sgRNA) target sequences for Erlin2, the E-CRISPR tool (<http://www.e-crisp.org>)  
620 was used (Heigwer et al., 2014). The target sequence 5'-  
621 CACCGGCTGTGCACAAGATAGAAGA-3' was then cloned in a BbsI linearized px459.v2  
622 vector containing puromycin selection. For the siRNA screen, an ON-TARGETplus  
623 SMARTpool custom library (Thermo Fisher Scientific) was used ([Supplementary file 1](#)).  
624 Knocking down RHBDL4 and NGLY 25 pmol ON-TARGETplus SMARTpools human siRNA  
625 (Dharmacon) were used. The amount of transfected siRNA was kept constant within an  
626 experiment by the addition of scrambled control.

627

### 628 *Cell lines and transfection*

629 Hek293T cells were cultured in DMEM (Invitrogen) complemented with 10% fetal bovine  
630 serum at 37°C in 5% CO<sub>2</sub>. Transient transfections were performed using 25 kDa linear  
631 polyethyleneimine (Polysciences) (Durocher et al., 2002) as had been described (Fleig et al.,  
632 2012). Typically, 500 ng plasmid encoding substrate candidate and 100 ng plasmid encoding  
633 RHBDL4 were used per well of a 6-well plate. Total transfected DNA (2 µg/well) was held  
634 constant by the addition of empty plasmid. If not otherwise stated, cells were harvested 48 h  
635 after transfection. For short-term knockdown, siRNA was transfected using RNAimax  
636 (Invitrogen) transfection reagent according to manufacturer recommendation. For  
637 simultaneous transfection of siRNA and plasmid DNA Lipofectamin2000 (Invitrogen)  
638 transfection reagent was applied according to manufacturer protocol. For inhibition of the  
639 proteasome or p97, approx. 32 h post-transfection either 2 µM MG132 (Calbiochem) or  
640 2.5 µM CB-5083 (ApexBio) were added from a 10,000 x stock in dimethylsulfoxide (DMSO).  
641 As a vehicle control, the same amount of DMSO was used. Subsequently, cells were further  
642 incubated and harvested 16 h later. Cells were lysed in SDS sample buffer (see below).

643

644 To prepare doxycycline-inducible stably transfected cells, pcDNA5/FRT/TO/FLAG-MHC202,  
645 Flp-In Hek293T-REx cells were co-transfected with pOG44 (Invitrogen), followed by selection  
646 with hygromycin B (125 µg/ml). RHBDL4 knockout cells had been described previously  
647 (Knopf et al., 2020). For generating Erlin2 knockout cells, 1 µg of CRISPR/Cas9 vector were  
648 transfected into Hek293T. After 24 h, a single cell dilution was performed. Clones were  
649 analyzed by western blotting and sequencing of a PCR amplicon obtained from genomic  
650 DNA. Primers used for validation of Erlin2 knockout cells were: 5'-  
651 CTTGAGCAACGGCTGTATCC-3' and 5'- AATCACCACCCATGGCATCAT-3' leading to a  
652 610 bp amplicon. Erlin1 knockout cells and Erlin1Erlin2 double knockout cells were  
653 respectively generated in parental Hek293T, and Hek293T Erlin2 knockout cells by  
654 introducing a Stop cassette in exon 3 according to previously described CRISPR/Cas12

655 mediated gene editing (Fueller et al., 2020). Primers used for validation were 5'-  
656 CCAGAGGTACGGTTGGTTGA-3' and 5'-CCTTCCAAGCTTCCTGGTTCA-3', leading to a  
657 547 bp amplicon. Generation of chromosomally tagged RHBDL4-FLAG Hek293T cells with a  
658 single FLAG before the stop codon in the last exon by using CRISPR/Cas12 mediated gene  
659 editing has been described before (Fueller et al., 2020). Primers used for validation were: 5'-  
660 TTATGGAGCACGATGGAAGGAA-3' and 5'-GAGATGGGAGCGTGGAAACT-3', leading to a  
661 634 bp amplicon. Hrd1 knockout cells were generated according to previously described  
662 CRISPR/Cas12 mediated gene editing (Fueller et al., 2020). The cells were validated by  
663 using the following primers: 5'-GGCTATTTTGCACAGCACGA-3' and 5'-  
664 CTTCCACCTGCTCCAGAACT-3', leading to a 786 bp amplicon. The obtained PCR  
665 amplicons were sequenced by Sanger sequencing and analyzed using CRISP-ID (Dehairs et  
666 al., 2016).

667

#### 668 *Antibodies*

669 The following antibodies were used: mouse monoclonal anti-FLAG (M2, Sigma), rat  
670 monoclonal anti-HA (Roche), mouse anti-myc (New England Biolabs), rabbit polyclonal anti-  
671 GFP (gift from Oliver Gruss) and mouse monoclonal anti-GFP (Roche), mouse monoclonal  
672 anti- $\beta$  actin (Sigma), mouse monoclonal anti-Derlin1 (Sigma), rabbit polyclonal anti-p97 (gift  
673 from Bernd Dobberstein), rabbit polyclonal anti-H2B (Abcam), mouse monoclonal anti-Bap31  
674 (Alexis Biochemicals), rabbit polyclonal anti-Synoviolin (Bethyl laboratories Inc.), mouse  
675 monoclonal anti-CLIMP63 (Enzo Life Sciences), rabbit polyclonal anti-Erlin1 (Sigma), rabbit  
676 polyclonal anti-Erlin2 (Sigma), rabbit polyclonal anti-LC3B (Bio Techne GmbH), rabbit  
677 polyclonal anti-RHBDL4 (Sigma) and rabbit polyclonal anti-RHBDL4 (Fleig et al., 2012).

678

#### 679 *Trageted siRNA screen*

680 Downregulation of the 40 candidate proteins ([Figure 1B](#) and [Figure 1 – figure supplement](#)  
681 [1A](#)) was conducted by using two different sets of pre-designed ON-TARGETplus  
682 SMARTpool custom siRNA libraries (Thermo Fisher Scientific). p97 was used as both  
683 positive and loading control. The #1 set was tested only one time and two times for the #2  
684 set (see additional [Supplementary file 1](#)). For quantification, MHC202 steady-state level were  
685 not normalized to loading control p97 ([Figure 1 – figure supplement 1A](#)). The knockdown  
686 efficiency of the siRNA screen was not validated.

687

688

689 *Microscopy*

690 For immunofluorescence analysis, cells were either chemically fixed in PBS containing 4%  
691 paraformaldehyde for 30 min followed by permeabilization in PBS containing 0.5% Triton X-  
692 100 for 10 min (Figure 2 – figure supplement 1D) or fixed in methanol at -20°C for 5 minutes  
693 (Figure 2 – figure supplement 1E). Subsequently, cells were washed with PBS, blocked with  
694 20 % fetal calf serum in PBS and probed with affinity-purified anti RHBDL4 antibody (1:50;  
695 see above) and anti-FLAG antibody (1:1000). After staining with fluorescently labelled  
696 secondary antibody (Santa Cruz Biotechnology), slides were analyzed using a TCS SP5  
697 confocal microscope (Leica).

698

699 *NP40 solubility assay*

700 To test the influence of RHBDL4 on the solubility of proteins, 300 ng substrate expressing  
701 vector was transfected with 1000 ng shRNA and 700 ng empty vector. After 24 - 48 h of  
702 transfection, cells were pelleted and solubilized in NP40 lysis buffer (50 mM Tris-Cl, pH 7.4,  
703 150 mM NaCl, 2 mM MgCl<sub>2</sub>, 1% Nonidet P-40) supplemented with 1xPI. After 10 min  
704 centrifugation at full speed at 4°C, supernatant corresponding to the soluble fraction was  
705 transferred into a new tube containing 4x sample buffer (see below). The pellet was  
706 dissolved in 1x sample buffer and corresponds to insoluble fraction.

707

708 *Cycloheximide chase*

709 Cycloheximide (100 µg/ml) chase was conducted 24 h after transfection of Hek293T cells.  
710 For inhibition of the vacuolar ATPase cells were treated with 100 nM BafA1 (AdipoGen Life  
711 Sciences). Cell extracts were subjected to western blot analysis as described below.

712

713 *Pulse-chase analysis*

714 For pulse-chase analysis, transfected Hek293T Hrd1 knockout cells were starved for 1 h in  
715 methionine/cysteine free DMEM (Invitrogen) supplemented with 10% dialysed fetal calf  
716 serum. Consequently, cells were metabolically labelled for 20 min with 55 µ Ci/ml 35S-  
717 methionine/cysteine protein labelling mix (PerkinElmer). Cells were washed with PBS and  
718 cultured in DMEM (Invitrogen) complemented with 10% fetal bovine serum. At the harvesting  
719 time point, cells were rinsed with PBS and solubilized with 1% Triton X-100 in IP buffer (50  
720 mM HEPES-KOH, pH 7.4, 150 mM NaCl, 2 mM MgOAc<sub>2</sub>, 10% glycerol, 1 mM EGTA)  
721 followed by FLAG-IP (as described below). Samples were subjected to SDS-PAGE, and  
722 labelled proteins were visualized by a FLA-7000 phosphorimager (Fuji).

723

724

725 *Protease protection assay*

726 Protease protection assay was performed using microsomes obtained by hypotonic swelling  
727 and centrifugation from Hek293T cells 24 h after transfection. To this end, cells were  
728 resuspended in isolation buffer (10 mM HEPES-KOH pH 7.4, 1.5 mM MgCl<sub>2</sub>, 10 mM KCl, 0.5  
729 mM dithiothreitol, 10 μg/ml phenylmethylsulfonyl fluoride (PMSF)). After 10 min incubation at  
730 4°C, cells were lysed by passing six times through a 27-gauge needle. Cellular debris and  
731 nuclei were discarded after centrifugation at 1,000 g for 5 min at 4°C. The supernatant was  
732 spun at 100,000 g for 30 min at 4°C. The membrane pellet was resuspended in rough  
733 microsome buffer (50 mM HEPES-KOH pH 7.4, 250 mM sucrose, 50 mM KOAc, 5 mM  
734 MgO(Ac)<sub>2</sub>, 1 mM dithiothreitol). Microsomal fraction was incubated with Proteinase-K (500  
735 μg/ml) or Proteinase-K with 1% TritonX-100 for 15 min on ice. The reaction was stopped by  
736 adding 2.5 mM PMFS for 5 min on ice. Samples were resuspended in SDS sample buffer  
737 followed by SDS-PAGE and western blotting (see below).

738

739 *Immunoprecipitation and proteomics*

740 If not indicated differently, all steps were performed at 4°C. For substrate trapping, RHBDL4-  
741 GFP expressing Hek293T cells were solubilized with 1% Triton X-100 in IP buffer (50 mM  
742 HEPES-KOH, pH 7.4, 150 mM NaCl, 2 mM MgOAc<sub>2</sub>, 10% glycerol, 1 mM EGTA), containing  
743 1xPI and 10 μg/ml PMSF. Cell lysates were cleared by centrifugation at 10,000 g for 10 min,  
744 following pre-clearing for 1 h with BSA-coupled sepharose beads or protein A/G beads. Anti-  
745 GFP immunoprecipitation was performed using a monoclonal GFP-specific antibody in  
746 combination with protein G beads (Figure 1E) or GFP-specific single-chain antibody fragment  
747 (Rothbauer et al., 2008) coupled to NHS-activated sepharose beads (Figure 5C) as  
748 described (Fleig et al., 2012). For immunoprecipitation of HA-tagged proteins, anti-HA  
749 antibody-coupled agarose beads (Sigma) were used. For immunoprecipitation of  
750 endogenous RHBDL4, the primary antibody was added together with protein A beads for  
751 overnight incubation. For immunoprecipitation of endogenous Erlin1 or Erlin2, the primary  
752 antibody was added together with protein A beads for overnight incubation.  
753 Immunoprecipitates were washed three times in IP buffer containing 0.1% Triton X-100 and  
754 then resuspended in SDS sample buffer followed by SDS-PAGE and western blotting (see  
755 below).

756

757 For isolation of endogenous RHBDL4 interaction partners by shotgun proteomics, Hek293T-  
758 RHBDL4-FLAG cells were grown for at least six doublings in medium supplemented with  
759 heavy amino acids (<sup>13</sup>C<sub>6</sub><sup>15</sup>N<sub>4</sub>-L-Arg and <sup>13</sup>C<sub>6</sub><sup>15</sup>N<sub>2</sub>-L-Lys, from Silantes), whereas the parenteral  
760 Hek293T cells cultured in light-medium were used as control. The third replicate was  
761 performed with a label swap to minimize the experimental error. After harvesting, an equal

762 number of cells from both cultures were mixed, and pooled microsome fraction was isolated  
763 by hypotonic swelling and centrifugation as described above. For immunoprecipitation of  
764 RHBDL4-FLAG, microsomes were solubilized with 1% Triton X-100 in IP buffer, containing  
765 1xPI and 10  $\mu\text{g/ml}$  PMSF. Cell lysates were cleared by centrifugation at 20,000 g for 10 min.  
766 Pre-clearing with protein A beads and anti-FLAG immunoprecipitation was performed as  
767 described above. The immunocomplexes were eluted in SDS sample buffer and resolved by  
768 SDS-PAGE. The lane was subdivided into three pieces, and an in-gel trypsin digest was  
769 performed. First, proteins were reduced with DTT, alkylated with iodoacetamide and then  
770 digested with trypsin. Following digestion, peptides were extracted with 50%  
771 acetonitrile/0.1% TFA and concentrated in a SpeedVac vacuum centrifuge. The sample was  
772 analyzed by a UPLC system (nanoAcquity) coupled to an ESI LTQ Orbitrap mass  
773 spectrometer (Thermo). The uninterpreted MS/MS spectra were searched against the  
774 SwissProt-human database using MaxQuant software. The algorithm was set to use trypsin  
775 as enzyme, allowing at maximum for two missed cleavage site, assuming carbamidomethyl  
776 as a fixed modification of cysteine, and oxidized methionine and deamidation of asparagines  
777 and glutamine as variable modifications. Mass tolerance was set to 4.5 ppm and 0.2 Da for  
778 MS and MS/MS, respectively. In MaxQuant the 'requantify' and 'match between runs' option  
779 was utilized, the target decoy method was used to determine 1% false discovery rate. All  
780 analysis was performed on the "protein groups" file using Perseus software version 1.6.5.0  
781 (Tyanova et al., 2016) and Microsoft Excel. Label-free intensities were used to calculate the  
782 heavy over light ratios, which were averaged over all three biological replicates. P values of  
783  $\log_2$  transformed data were determined by one-sample t-test. The cutoff for a protein to be  
784 called significantly enriched was set to fold change  $>1.4$  and p-value  $<0.05$ .

785

#### 786 *Blue native PAGE*

787 If not indicated differently, all steps were performed at 4°C. Hek293T cells ectopically  
788 expressing RHBDL4-FLAG or expressing chromosomally FLAG-tagged RHBDL4 were lysed  
789 with 1% Triton X-100 in BN buffer (50 mM HEPES-KOH, pH 7.4, 150 mM NaCl, 2 mM  
790  $\text{MgOAc}_2$ , 10% glycerol, 1 mM EGTA) supplemented with EDTA-free complete protease  
791 inhibitor cocktail (1xPI, Roche) and 10  $\mu\text{g/ml}$  PMSF. After removing cell debris, 10  $\mu\text{l}$  anti-  
792 FLAG antibody-conjugated agarose beads (M2, Sigma) were added. After a 3 h incubation,  
793 beads were washed twice with BN buffer containing 0.2% Triton X-100 and subsequently  
794 eluted with 0.5  $\mu\text{g}/\mu\text{l}$  FLAG peptide for 30 min. A 1/40 volume of BN sample buffer (500 mM  
795 6-aminohexanoic acid, 100 mM bis Tris pH 7.0, 5% Coomassie G250) was added before  
796 subjection onto NativePAGE Novex Bis-Tris 3-12% gradient gels (Thermo). Gels were run for  
797 1 h at 150 V, buffer changed according to the manufacturer's description and then continued  
798 at 230 V for 45 min. Afterwards, gels were incubated for 15 min in blotting buffer, then

799 transferred at 85 mA for 70 min onto PVDF membrane using a tank-blotting system. The  
800 PVDF membrane was incubated in fixation solution (40% methanol, 10% acetic acid),  
801 blocked in 5% milk TBS-Tween (10 mM Tris-Cl pH 7.4, 150 mM NaCl, 0.1% Tween 20), and  
802 analyzed using enhanced chemiluminescence (see below).

803

#### 804 *Western blotting*

805 Transfected cells and immunoprecipitated proteins were solubilized in Tris-glycine SDS-PAGE  
806 sample buffer (50 mM Tris-Cl pH 6.8, 10 mM EDTA, 5% glycerol, 2% SDS, 0.01%  
807 bromphenol blue, 5%  $\beta$ -mercaptoethanol). All samples were incubated for 15 min at 65°C.  
808 For deglycosylation, solubilized proteins were treated with Endo H and PNGase F (New  
809 England Biolabs) according to the manufacturer's protocol. Denatured and fully-reduced  
810 proteins were resolved on Tris-glycine SDS-PAGE followed by western blot analysis onto  
811 PVDF membrane (Immobilon-P, 0.45  $\mu$ m pore size, Merck Millipore) using enhanced  
812 chemiluminescence to detect bound antibodies (Pierce). For the analysis of ER $\beta$ -derived  
813 cleavage fragments (<10 kDa), post-nuclear supernatants from Triton X-100 solubilized cells  
814 were mixed with Tris-bicine-urea SDS-sample buffer (360 mM BisTris, 160 mM bicine, 1%  
815 SDS, 50 mM dithiothreitol, 15% sucrose, 0.01% bromphenol blue, and 0.004% Serva blue),  
816 heated at 65°C. Peptides were separated to Tris/Bicine-urea PAGE (15% T, 5% C, 8 M urea)  
817 (Wiltfang et al., 1997), transfer onto PVDF membrane with 0.2  $\mu$ m pore size and analyzed by  
818 western blotting. For detection, the LAS-4000 system (Fuji) was used.

819

#### 820 *Reproducibility and statistics*

821 The number of biological replicates of experiments is described in the figure legends. For  
822 quantification, band intensities were measured using the Fiji ImageJ software (Schindelin et  
823 al., 2012). For statistical analysis GraphPad Prism was used. Student's t-test was used for  
824 statistical analysis of protein steady-state levels, and two-way ANOVA was used to calculate  
825 p values of CHX chase and pulse-chase experiments..

826

#### 827 **Data availability**

828 The mass spectrometry proteomic data have been deposited to the ProteomeXchange  
829 Consortium (<http://proteomecentral.proteomexchange.org>) via the PRIDE partner repository  
830 (Perez-Riverol et al., 2019) with the dataset identifier PXD027346.

831

832



833 **Acknowledgements**

834 We gratefully acknowledge the contribution of Lina Wunderle to the beginning of this project.

835 We thank Maya Schuldiner, Richard Wojcikiewicz, Ron Kopito, Maurizio Molinari, Jeff

836 Brodsky and Mark Hipp for reagents. We thank Matthias Feige and Sebastian Schuck for the

837 critical reading of the manuscript. Mass spectrometry was performed at the ZMBH Core

838 facility for mass spectrometry and proteomics. This study was supported by the Deutsche

839 Forschungsgemeinschaft (DFG, German Research Foundation) 20134854 / SFB1036/2-

840 TP12 (to MKL), a fellowship by the Boehringer Ingelheim Fonds (to JDK) and an intramural

841 research program of the National Institute of Diabetes, Digestive & Kidney Diseases in the

842 National Institutes of Health (to YY).

843

844

845 **Author contribution**

846 JB and NK designed and performed most experiments and wrote the manuscript. JDK

847 carried out experiments. JGL performed and validated the siRNA screen. NL initiated the

848 interactome analysis and validated interaction partners. YY helped designing the project.

849 MKL guided the project and wrote the manuscript.

850

851

852 **Conflict of interest**

853 The authors declare that they have no conflict of interest.

## 854 **References**

- 855 Abe, F., Van Prooyen, N., Ladasky, J.J., and Edidin, M. (2009). Interaction of Bap31 and  
856 MHC class I molecules and their traffic out of the endoplasmic reticulum. *Journal of*  
857 *immunology* (Baltimore, Md : 1950) *182*, 4776-4783.
- 858 Altan-Bonnet, N., Sougrat, R., Liu, W., Snapp, E.L., Ward, T., and Lippincott-Schwartz, J.  
859 (2006). Golgi inheritance in mammalian cells is mediated through endoplasmic reticulum  
860 export activities. *Mol Biol Cell* *17*, 990-1005.
- 861 Anderson, D.J., Le Moigne, R., Djakovic, S., Kumar, B., Rice, J., Wong, S., Wang, J., Yao,  
862 B., Valle, E., Kiss von Soly, S., *et al.* (2015). Targeting the AAA ATPase p97 as an Approach  
863 to Treat Cancer through Disruption of Protein Homeostasis. *Cancer cell* *28*, 653-665.
- 864 Arutyunova, E., Jiang, Z., Yang, J., Kulepa, A.N., Young, H.S., Verhelst, S., O'Donoghue,  
865 A.J., and Lemieux, M.J. (2018). An internally quenched peptide as a new model substrate for  
866 rhomboid intramembrane proteases. *Biological chemistry*.
- 867 Ast, T., Michaelis, S., and Schuldiner, M. (2016). The Protease Ste24 Clears Clogged  
868 Translocons. *Cell* *164*, 103-114.
- 869 Avci, D., and Lemberg, M.K. (2015). Clipping or Extracting: Two Ways to Membrane Protein  
870 Degradation. *Trends Cell Biol* *25*, 611-622.
- 871 Baker, R.P., and Urban, S. (2012). Architectural and thermodynamic principles underlying  
872 intramembrane protease function. *Nat Chem Biol* *8*, 759-768.
- 873 Balchin, D., Hayer-Hartl, M., and Hartl, F.U. (2016). In vivo aspects of protein folding and  
874 quality control. *Science* *353*, aac4354.
- 875 Baldrige, R.D., and Rapoport, T.A. (2016). Autoubiquitination of the Hrd1 Ligase Triggers  
876 Protein Retrotranslocation in ERAD. *Cell* *166*, 394-407.
- 877 Began, J., Cordier, B., Brezinova, J., Delisle, J., Hexnerova, R., Srb, P., Rampirova, P.,  
878 Kozisek, M., Baudet, M., Coute, Y., *et al.* (2020). Rhomboid intramembrane protease YqgP  
879 licenses bacterial membrane protein quality control as adaptor of FtsH AAA protease. *EMBO*  
880 *J*, e102935.
- 881 Bernasconi, R., Galli, C., Calanca, V., Nakajima, T., and Molinari, M. (2010). Stringent  
882 requirement for HRD1, SEL1L, and OS-9/XTP3-B for disposal of ERAD-LS substrates. *J Cell*  
883 *Biol* *188*, 223-235.
- 884 Bonifacino, J.S., Suzuki, C.K., and Klausner, R.D. (1990). A peptide sequence confers  
885 retention and rapid degradation in the endoplasmic reticulum. *Science* *247*, 79-82.
- 886 Brennan, S.O., Maghzal, G., Shneider, B.L., Gordon, R., Magid, M.S., and George, P.M.  
887 (2002). Novel fibrinogen gamma375 Arg-->Trp mutation (fibrinogen aguadilla) causes  
888 hepatic endoplasmic reticulum storage and hypofibrinogenemia. *Hepatology* (Baltimore, Md)  
889 *36*, 652-658.
- 890 Breydo, L., and Uversky, V.N. (2015). Structural, morphological, and functional diversity of  
891 amyloid oligomers. *FEBS Lett* *589*, 2640-2648.
- 892 Browman, D.T., Hoegg, M.B., and Robbins, S.M. (2007). The SPFH domain-containing  
893 proteins: more than lipid raft markers. *Trends Cell Biol* *17*, 394-402.

- 894 Browman, D.T., Resek, M.E., Zajchowski, L.D., and Robbins, S.M. (2006). Erlin-1 and erlin-2  
895 are novel members of the prohibitin family of proteins that define lipid-raft-like domains of the  
896 ER. *J Cell Sci* *119*, 3149-3160.
- 897 Bulek, A.M., Cole, D.K., Skowera, A., Dolton, G., Gras, S., Madura, F., Fuller, A., Miles, J.J.,  
898 Gostick, E., Price, D.A., *et al.* (2012). Structural basis for the killing of human beta cells by  
899 CD8(+) T cells in type 1 diabetes. *Nat Immunol* *13*, 283-289.
- 900 Carvalho, P., Goder, V., and Rapoport, T.A. (2006). Distinct ubiquitin-ligase complexes  
901 define convergent pathways for the degradation of ER proteins. *Cell* *126*, 361-373.
- 902 Chen, C., Malchus, N.S., Hehn, B., Stelzer, W., Avci, D., Langosch, D., and Lemberg, M.K.  
903 (2014). Signal peptide peptidase functions in ERAD to cleave the unfolded protein response  
904 regulator XBP1u. *EMBO J* *33*, 2492-2506.
- 905 Chiti, F., and Dobson, C.M. (2017). Protein Misfolding, Amyloid Formation, and Human  
906 Disease: A Summary of Progress Over the Last Decade. *Annu Rev Biochem* *86*, 27-68.
- 907 Cho, S., Dickey, S.W., and Urban, S. (2016). Crystal Structures and Inhibition Kinetics  
908 Reveal a Two-Stage Catalytic Mechanism with Drug Design Implications for Rhomboid  
909 Proteolysis. *Mol Cell* *61*, 329-340.
- 910 Christianson, J.C., Olzmann, J.A., Shaler, T.A., Sowa, M.E., Bennett, E.J., Richter, C.M.,  
911 Tyler, R.E., Greenblatt, E.J., Wade Harper, J., and Kopito, R.R. (2011). Defining human  
912 ERAD networks through an integrative mapping strategy. *Nat Cell Biol* *14*, 93-105.
- 913 Christianson, J.C., and Ye, Y. (2014). Cleaning up in the endoplasmic reticulum: ubiquitin in  
914 charge. *Nat Struct Mol Biol* *21*, 325-335.
- 915 Dehairs, J., Talebi, A., Cherifi, Y., and Swinnen, J.V. (2016). CRISP-ID: decoding CRISPR  
916 mediated indels by Sanger sequencing. *Scientific reports* *6*, 28973.
- 917 Denic, V., Quan, E.M., and Weissman, J.S. (2006). A luminal surveillance complex that  
918 selects misfolded glycoproteins for ER-associated degradation. *Cell* *126*, 349-359.
- 919 Durocher, Y., Perret, S., and Kamen, A. (2002). High-level and high-throughput recombinant  
920 protein production by transient transfection of suspension-growing human 293-EBNA1 cells.  
921 *Nucleic Acids Res* *30*, E9.
- 922 Edbauer, D., Winkler, E., Regula, J.T., Pesold, B., Steiner, H., and Haass, C. (2003).  
923 Reconstitution of g-secretase activity. *Nat Cell Biol* *5*, 486-488.
- 924 Fleig, L., Bergbold, N., Sahasrabudhe, P., Geiger, B., Kaltak, L., and Lemberg, M.K. (2012).  
925 Ubiquitin-Dependent Intramembrane Rhomboid Protease Promotes ERAD of Membrane  
926 Proteins. *Mol Cell* *47*, 558-569.
- 927 Fregno, I., Fasana, E., Bergmann, T.J., Raimondi, A., Loi, M., Solda, T., Galli, C., D'Antuono,  
928 R., Morone, D., Danieli, A., *et al.* (2018). ER-to-lysosome-associated degradation of  
929 proteasome-resistant ATZ polymers occurs via receptor-mediated vesicular transport. *Embo*  
930 *j.*
- 931 Fu, L., and Sztul, E. (2009). ER-associated complexes (ERACs) containing aggregated  
932 cystic fibrosis transmembrane conductance regulator (CFTR) are degraded by autophagy.  
933 *European journal of cell biology* *88*, 215-226.

- 934 Fueller, J., Herbst, K., Meurer, M., Gubicza, K., Kurtulmus, B., Knopf, J.D., Kirrmaier, D.,  
935 Buchmuller, B.C., Pereira, G., Lemberg, M.K., *et al.* (2020). CRISPR-Cas12a-assisted PCR  
936 tagging of mammalian genes. *J Cell Biol* 219.
- 937 Greenblatt, E.J., Olzmann, J.A., and Kopito, R.R. (2011). Derlin-1 is a rhomboid  
938 pseudoprotease required for the dislocation of mutant alpha-1 antitrypsin from the  
939 endoplasmic reticulum. *Nat Struct Mol Biol* 18, 1147-1152.
- 940 Heigwer, F., Kerr, G., and Boutros, M. (2014). E-CRISP: fast CRISPR target site  
941 identification. *Nature methods* 11, 122-123.
- 942 Hirsch, C., Blom, D., and Ploegh, H.L. (2003). A role for N-glycanase in the cytosolic turnover  
943 of glycoproteins. *EMBO J* 22, 1036-1046.
- 944 Hosokawa, N., Tremblay, L.O., You, Z., Herscovics, A., Wada, I., and Nagata, K. (2003).  
945 Enhancement of endoplasmic reticulum (ER) degradation of misfolded Null Hong Kong  
946 alpha1-antitrypsin by human ER mannosidase I. *J Biol Chem* 278, 26287-26294.
- 947 Huber, M.D., Vesely, P.W., Datta, K., and Gerace, L. (2013). Erlins restrict SREBP activation  
948 in the ER and regulate cellular cholesterol homeostasis. *J Cell Biol* 203, 427-436.
- 949 Ikeda, K.N., and Freeman, M. (2019). Spatial proteomics reveal that the protein phosphatase  
950 PTP1B interacts with and may modify tyrosine phosphorylation of the rhomboid protease  
951 RHBDL4. *J Biol Chem*.
- 952 Inoue, T., and Tsai, B. (2017). Regulated Erlin-dependent release of the B12 transmembrane  
953 J-protein promotes ER membrane penetration of a non-enveloped virus. *PLoS Pathog* 13,  
954 e1006439.
- 955 Juszkiwicz, S., and Hegde, R.S. (2018). Quality Control of Orphaned Proteins. *Mol Cell* 71,  
956 443-457.
- 957 Kimberly, W.T., LaVoie, M.J., Ostaszewski, B.L., Ye, W., Wolfe, M.S., and Selkoe, D.J.  
958 (2003). Gamma-secretase is a membrane protein complex comprised of presenilin, nicastrin,  
959 Aph-1, and Pen-2. *Proceedings of the National Academy of Sciences of the United States of*  
960 *America* 100, 6382-6387.
- 961 Knopf, J.D., Landscheidt, N., Pegg, C.L., Schulz, B.L., Kuhnle, N., Chao, C.W., Huck, S., and  
962 Lemberg, M.K. (2020). Intramembrane protease RHBDL4 cleaves oligosaccharyltransferase  
963 subunits to target them for ER-associated degradation. *J Cell Sci*.
- 964 Knopf, J.D., and Lemberg, M.K. (2020). Derlins with scissors: primordial ERAD in bacteria.  
965 *EMBO J* 39, e105012.
- 966 Koga, H., Kaushik, S., and Cuervo, A.M. (2011). Protein homeostasis and aging: The  
967 importance of exquisite quality control. *Ageing research reviews* 10, 205-215.
- 968 Kruse, K.B., Dear, A., Kaltenbrun, E.R., Crum, B.E., George, P.M., Brennan, S.O., and  
969 McCracken, A.A. (2006). Mutant fibrinogen cleared from the endoplasmic reticulum via  
970 endoplasmic reticulum-associated protein degradation and autophagy: an explanation for  
971 liver disease. *The American journal of pathology* 168, 1299-1308; quiz 1404-1295.
- 972 Kühnle, N., Dederer, V., and Lemberg, M.K. (2019). Intramembrane proteolysis at a glance:  
973 from signalling to protein degradation. *J Cell Sci* 132.
- 974 Labbadia, J., and Morimoto, R.I. (2015). The biology of proteostasis in aging and disease.  
975 *Annu Rev Biochem* 84, 435-464.

- 976 Lemberg, M.K., Menendez, J., Misik, A., Garcia, M., Koth, C.M., and Freeman, M. (2005).  
977 Mechanism of intramembrane proteolysis investigated with purified rhomboid proteases.  
978 *EMBO J* 24, 464-472.
- 979 Lemberg, M.K., and Strisovsky, K. (2021). Maintenance of organellar protein homeostasis by  
980 ER-associated degradation and related mechanisms. *Molecular Cell*, in revision.
- 981 Lim, J.J., Lee, Y., Ly, T.T., Kang, J.Y., Lee, J.G., An, J.Y., Youn, H.S., Park, K.R., Kim, T.G.,  
982 Yang, J.K., *et al.* (2016). Structural insights into the interaction of p97 N-terminus domain and  
983 VBM in rhomboid protease, RHBDL4. *Biochem J* 473, 2863-2880.
- 984 Liu, G., Beaton, S.E., Grieve, A.G., Evans, R., Rogers, M., Strisovsky, K., Armstrong, F.A.,  
985 Freeman, M., Exley, R.M., and Tang, C.M. (2020). Bacterial rhomboids mediate quality  
986 control of orphan membrane proteins. *EMBO J*.
- 987 Lu, J.P., Wang, Y., Sliter, D.A., Pearce, M.M., and Wojcikiewicz, R.J. (2011). RNF170  
988 protein, an endoplasmic reticulum membrane ubiquitin ligase, mediates inositol 1,4,5-  
989 trisphosphate receptor ubiquitination and degradation. *J Biol Chem* 286, 24426-24433.
- 990 Maegawa, S., Koide, K., Ito, K., and Akiyama, Y. (2007). The intramembrane active site of  
991 GlpG, an *E. coli* rhomboid protease, is accessible to water and hydrolyses an  
992 extramembrane peptide bond of substrates. *Mol Microbiol* 64, 435-447.
- 993 McCaffrey, K., and Braakman, I. (2016). Protein quality control at the endoplasmic reticulum.  
994 *Essays in biochemistry* 60, 227-235.
- 995 Mogk, A., Bukau, B., and Kampinga, H.H. (2018). Cellular Handling of Protein Aggregates by  
996 Disaggregation Machines. *Mol Cell* 69, 214-226.
- 997 Molinari, M. (2021). ER-phagy responses in yeast, plants, and mammalian cells and their  
998 crosstalk with UPR and ERAD. *Dev Cell* 56, 949-966.
- 999 Mueller, B., Lilley, B.N., and Ploegh, H.L. (2006). SEL1L, the homologue of yeast Hrd3p, is  
1000 involved in protein dislocation from the mammalian ER. *J Cell Biol* 175, 261-270.
- 1001 Neal, S., Jaeger, P., Duttke, S., Benner, C., Glass, T., and Hampton, R. (2018). The Dfm1  
1002 derlin is required for ERAD retrotranslocation of integral membrane proteins. *Mol Cell*.
- 1003 Paschkowsky, S., Recinto, S.J., Young, J.C., Bondar, A.N., and Munter, L.M. (2018).  
1004 Membrane cholesterol as regulator of human rhomboid protease RHBDL4. *J Biol Chem*.
- 1005 Pearce, M.M., Wang, Y., Kelley, G.G., and Wojcikiewicz, R.J. (2007). SPFH2 mediates the  
1006 endoplasmic reticulum-associated degradation of inositol 1,4,5-trisphosphate receptors and  
1007 other substrates in mammalian cells. *J Biol Chem* 282, 20104-20115.
- 1008 Pearce, M.M., Wormer, D.B., Wilkens, S., and Wojcikiewicz, R.J. (2009). An endoplasmic  
1009 reticulum (ER) membrane complex composed of SPFH1 and SPFH2 mediates the ER-  
1010 associated degradation of inositol 1,4,5-trisphosphate receptors. *J Biol Chem* 284, 10433-  
1011 10445.
- 1012 Reis-Rodrigues, P., Czerwieńiec, G., Peters, T.W., Evani, U.S., Alavez, S., Gaman, E.A.,  
1013 Vantipalli, M., Mooney, S.D., Gibson, B.W., Lithgow, G.J., *et al.* (2012). Proteomic analysis of  
1014 age-dependent changes in protein solubility identifies genes that modulate lifespan. *Aging*  
1015 *cell* 11, 120-127.

- 1016 Rothbauer, U., Zolghadr, K., Muyldermans, S., Schepers, A., Cardoso, M.C., and Leonhardt,  
1017 H. (2008). A versatile nanotrapp for biochemical and functional studies with fluorescent fusion  
1018 proteins. *Mol Cell Proteomics* 7, 282-289.
- 1019 Ruggiano, A., Foresti, O., and Carvalho, P. (2014). Quality control: ER-associated  
1020 degradation: protein quality control and beyond. *J Cell Biol* 204, 869-879.
- 1021 Schindelin, J., Arganda-Carreras, I., Frise, E., Kaynig, V., Longair, M., Pietzsch, T.,  
1022 Preibisch, S., Rueden, C., Saalfeld, S., Schmid, B., *et al.* (2012). Fiji: an open-source  
1023 platform for biological-image analysis. *Nature methods* 9, 676-682.
- 1024 Schoebel, S., Mi, W., Stein, A., Ovchinnikov, S., Pavlovicz, R., DiMaio, F., Baker, D.,  
1025 Chambers, M.G., Su, H., Li, D., *et al.* (2017). Cryo-EM structure of the protein-conducting  
1026 ERAD channel Hrd1 in complex with Hrd3. *Nature* 548, 352-355.
- 1027 Stagg, H.R., Thomas, M., van den Boomen, D., Wiertz, E.J., Drabkin, H.A., Gemmill, R.M.,  
1028 and Lehner, P.J. (2009). The TRC8 E3 ligase ubiquitinates MHC class I molecules before  
1029 dislocation from the ER. *J Cell Biol* 186, 685-692.
- 1030 Steglich, G., Neupert, W., and Langer, T. (1999). Prohibitins regulate membrane protein  
1031 degradation by the m-AAA protease in mitochondria. *Mol Cell Biol* 19, 3435-3442.
- 1032 Strisovsky, K., Sharpe, H.J., and Freeman, M. (2009). Sequence-specific intramembrane  
1033 proteolysis: identification of a recognition motif in rhomboid substrates. *Mol Cell* 36, 1048-  
1034 1059.
- 1035 Takasugi, N., Tomita, T., Hayashi, I., Tsuruoka, M., Niimura, M., Takahashi, Y., Thinakaran,  
1036 G., and Iwatsubo, T. (2003). The role of presenilin cofactors in the gamma-secretase  
1037 complex. *Nature* 422, 438-441.
- 1038 Tanahashi, H., and Tabira, T. (2007). A novel beta-site amyloid precursor protein cleaving  
1039 enzyme (BACE) isoform regulated by nonsense-mediated mRNA decay and proteasome-  
1040 dependent degradation. *Neurosci Lett* 428, 103-108.
- 1041 Tsao, Y.S., Ivessa, N.E., Adesnik, M., Sabatini, D.D., and Kreibich, G. (1992). Carboxy  
1042 terminally truncated forms of ribophorin I are degraded in pre-Golgi compartments by a  
1043 calcium-dependent process. *J Cell Biol* 116, 57-67.
- 1044 Tyanova, S., Temu, T., Sinitcyn, P., Carlson, A., Hein, M.Y., Geiger, T., Mann, M., and Cox,  
1045 J. (2016). The Perseus computational platform for comprehensive analysis of (prote)omics  
1046 data. *Nature methods* 13, 731-740.
- 1047 Urban, S., and Wolfe, M.S. (2005). Reconstitution of intramembrane proteolysis in vitro  
1048 reveals that pure rhomboid is sufficient for catalysis and specificity. *Proc Natl Acad Sci USA*  
1049 102, 1883-1888.
- 1050 Valetti, C., Grossi, C.E., Milstein, C., and Sitia, R. (1991). Russell bodies: a general response  
1051 of secretory cells to synthesis of a mutant immunoglobulin which can neither exit from, nor be  
1052 degraded in, the endoplasmic reticulum. *J Cell Biol* 115, 983-994.
- 1053 van der Goot, A.T., Pearce, M.M.P., Leto, D.E., Shaler, T.A., and Kopito, R.R. (2018).  
1054 Redundant and Antagonistic Roles of XTP3B and OS9 in Decoding Glycan and Non-glycan  
1055 Degrons in ER-Associated Degradation. *Mol Cell* 70, 516-530 e516.
- 1056 Vashist, S., and Ng, D.T. (2004). Misfolded proteins are sorted by a sequential checkpoint  
1057 mechanism of ER quality control. *J Cell Biol* 165, 41-52.

- 1058 Vincenz-Donnelly, L., Holthusen, H., Korner, R., Hansen, E.C., Presto, J., Johansson, J.,  
1059 Sawarkar, R., Hartl, F.U., and Hipp, M.S. (2018). High capacity of the endoplasmic reticulum  
1060 to prevent secretion and aggregation of amyloidogenic proteins. *Embo j* 37, 337-350.
- 1061 Wai, T., Saita, S., Nolte, H., Muller, S., Konig, T., Richter-Dennerlein, R., Sprenger, H.G.,  
1062 Madrenas, J., Muhlmeister, M., Brandt, U., *et al.* (2016). The membrane scaffold SLP2  
1063 anchors a proteolytic hub in mitochondria containing PARL and the i-AAA protease YME1L.  
1064 *EMBO Rep* 17, 1844-1856.
- 1065 Wang, Y., Zhang, Y., and Ha, Y. (2006). Crystal structure of a rhomboid family  
1066 intramembrane protease. *Nature* 444, 179-180.
- 1067 Wiertz, E.J., Jones, T.R., Sun, L., Bogyo, M., Geuze, H.J., and Ploegh, H.L. (1996). The  
1068 human cytomegalovirus US11 gene product dislocates MHC class I heavy chains from the  
1069 endoplasmic reticulum to the cytosol. *Cell* 84, 769-779.
- 1070 Wiltfang, J., Smirnov, A., Schnierstein, B., Kelemen, G., Matthies, U., Klafki, H.W.,  
1071 Staufienbiel, M., Huther, G., Ruther, E., and Kornhuber, J. (1997). Improved electrophoretic  
1072 separation and immunoblotting of b-amyloid (Ab) peptides 1-40, 1-42, and 1-43.  
1073 *Electrophoresis* 18, 527-532.
- 1074 Wu, X., and Rapoport, T.A. (2018). Mechanistic insights into ER-associated protein  
1075 degradation. *Curr Opin Cell Biol* 53, 22-28.
- 1076 Wu, X., Siggel, M., Ovchinnikov, S., Mi, W., Svetlov, V., Nudler, E., Liao, M., Hummer, G.,  
1077 and Rapoport, T.A. (2020). Structural basis of ER-associated protein degradation mediated  
1078 by the Hrd1 ubiquitin ligase complex. *Science* 368.
- 1079 Wunderle, L., Knopf, J.D., Kuhnle, N., Morle, A., Hehn, B., Adrain, C., Strisovsky, K.,  
1080 Freeman, M., and Lemberg, M.K. (2016). Rhomboid intramembrane protease RHBDL4  
1081 triggers ER-export and non-canonical secretion of membrane-anchored TGFalpha. *Scientific*  
1082 *reports* 6, 27342.
- 1083 Ye, Y., Meyer, H.H., and Rapoport, T.A. (2001). The AAA ATPase Cdc48/p97 and its  
1084 partners transport proteins from the ER into the cytosol. *Nature* 414, 652-656.
- 1085
- 1086

1087 **Figure Supplements Legends**

1088 **Figure 1 – figure supplement 1. MHC202 is degraded by a concerted action of the Hrd1**  
1089 **complex and RHBDL4.**

1090 **(A)** Influence of selected ERAD components on the steady-state level of MHC202 shown by  
1091 western blot (WB) of lysates from siRNA transfected cells detecting the C-terminal FLAG tag.  
1092 p97 was used as both positive and loading control. Knockdown efficiency of the siRNA  
1093 screen was not determined and quantification of MHC202 steady-state level was not  
1094 normalized to the loading control p97.

1095 **(B)** RHBDL4 knockdown with two independent shRNAs (R4-1 and R4-2) in Hek293T cells  
1096 leads to an increase of MHC202 steady-state level when compared to a non-targeting (nt)  
1097 control shRNA.  $\beta$ -actin was used as a loading control.

1098 **(C)** N-terminal FLAG-tagged NHK is stabilized in Hrd1 knockout cells ( $\Delta$ Hrd1) compared to  
1099 parental Hek293T cells (wt). Co-expression of FLAG-NHK and Hrd1 rescues the degradation  
1100 defect in  $\Delta$ Hrd1 cells.  $\beta$ -actin is used as a loading control. WB quantification of three  
1101 independent experiments is shown in the right panel (means  $\pm$  SEM, n=3, \*\*\*p  $\leq$  0.001 (two-  
1102 way ANOVA)).

1103 **(D)** siRNA knockdown of RHBDL4 delayed MHC202 degradation in Hek293T cells compared  
1104 to the non-targeting siRNA control (nt) in metabolic pulse label chase. The right panel shows  
1105 the quantification of autoradiograms of three independent experiments (means  $\pm$  SEM, n=2).

1106 **(E)** MHC202 (filled triangle) and its 18 kDa N-terminal fragment (open triangle) generated by  
1107 ectopically expressed HA-tagged RHBDL4 (R4-HA) are glycosylated as shown by sensitivity  
1108 to Endo H (E) and PNGase (P). Filled circle, deglycosylated full-length MHC202; open circle,  
1109 deglycosylated N-terminal cleavage fragment. Samples, as shown in Figure 1D, either  
1110 treated with vehicle control (DMSO) or MG132 (2  $\mu$ M).

1111 **(F)** Stabilization of the unglycosylated form of MHC202 (filled circle) by the catalytic inactive  
1112 mutant of RHBDL4 (SA-GFP) is abolished upon knockdown of N-glycanase (NGLY) when  
1113 compared to non-targeting control (nt).

1114 Data information: For clarity, for panels B-F representative experiments of three independent  
1115 replicates are shown.

1116

1117 **Figure 2 – figure supplement 1. RHBDL4 knockdown leads to accumulation of MHC202**  
1118 **in the ER.**

1119 **(A)** RHBDL4 cleaves C-terminally FLAG-tagged MHC202 with an additional C-terminal  
1120 glycosylation site (K197N) post-translocational as shown by the sensitivity of the C-terminal  
1121 fragment to Endo H (open triangle and open circle). Asterix, unspecific band; filled circle,  
1122 deglycosylated full-length MHC202; R4-HA, HA-tagged RHBDL4; hexagon, site for N-linked  
1123 glycosylation; SPase, signal peptidase; WB, western blotting.



1124 **(B)** RHBDL4 cleaves MHC202 lacking the native glycosylation site (N100Q) with a single  
1125 glycosylation site (K197N) in the C-terminal portion leading to an Endo H-sensitive and a  
1126 partially deglycosylated fragment (open triangle and open circle). Asterix, unspecific band;  
1127 filled circle, deglycosylated full-length MHC202; hexagon, site of N-linked glycosylation;  
1128 SPase, signal peptidase.

1129 **(C)** RHBDL4 does not cleave ERdj3-GFP-3Gly (filled triangle). Deglycosylated ERdj3-GFP-  
1130 3Gly (filled circle) is stabilized upon proteasomal inhibition by MG132 (2  $\mu$ M).  $\beta$ -actin was  
1131 used as a loading control.

1132 **(D)** Knockdown of RHBDL4 with two independent shRNAs (R4-1, R4-2) leads to MHC202  
1133 accumulation in the ER as shown by colocalization with RFP-KDEL; nt, non-targeting control  
1134 shRNA; scale bar, 10  $\mu$ m.

1135 **(E)** Knockdown of RHBDL4 with two independent shRNAs (R4-1, R4-2) increases MHC202  
1136 signal in stable T-REx Hek293T cell expressing FLAG-tagged MHC202, when compared to  
1137 nt control shRNA; scale bar, 10  $\mu$ m.

1138 **(F)** The N-terminal cleavage fragment (open triangle) of C-terminally FLAG-tagged MHC202  
1139 generated by the HA-tagged RHBDL4-R308A mutant is stabilized in the absence of  
1140 proteasome inhibitor MG132 (2  $\mu$ M). Similarly, co-expression of an RHBDL4 mutant lacking  
1141 the binding motif for p97 ( $\Delta$ VBM) together with MHC202 results in stabilization of the N-  
1142 terminal cleavage fragment. Impaired p97 interaction of RHBDL4 leads to a slightly reduced  
1143 steady-state level of deglycosylated unprocessed MHC202 form (filled circle).  $\beta$ -actin was  
1144 used as a loading control.

1145 **(G)** HA-tagged RHBDL4 mutant lacking the C-terminal domain ( $\Delta$ C) cleaves FLAG-tagged  
1146 MHC202 and stabilizes the deglycosylated unprocessed form of MHC202 (filled circle) even  
1147 in the absence of proteasome inhibitor MG132 (2  $\mu$ M).  $\beta$ -actin was used as a loading control.

1148 **(H)** The accessibility of MHC202 to exogenous proteinase K (PK) was analysed in ER-  
1149 derived microsomes. Hek293T cells were co-transfected with double-tagged MHC202 and  
1150 either an empty vector (-), RHBDL4 wt, or the RHBDL4-G202V mutant (G202V). Hek293T-  
1151 derived microsomes were incubated with PK in the presence and absence of 1 % TritonX-  
1152 100 (TX100). The R4-induced MHC202 cleavage fragment (open triangle) was protected  
1153 from exogenous PK, whereas full-length MHC202 was partially accessible. Erlin2 (epitope in  
1154 ER lumen) and Derlin1 (epitope in cytosol) were used as controls. Filled circle,  
1155 deglycosylated full-length MHC202. HA signals of three independent experiments were  
1156 quantified and shown in the right panel (means  $\pm$  SEM, n=3, \*p  $\leq$  0.05; \*\*p  $\leq$  0.01 (Student's  
1157 t-test)).

1158 **(I)** GFP-tagged RHBDL4-G202V (R4GV-GFP) interacts with endogenous p97, Erlin1 and -2,  
1159 but not CLIMP63 which was used as a negative control. Asterisks indicates unspecific band.

1160 Data information: For clarity, for all panels representative experiments of three independent  
1161 replicates are shown.

1162

1163 **Figure 3 – figure supplement 1. RHBDL4-catalyzed cleavage of BACE476 $\Delta$  generates a**  
1164 **glycosylated N-terminal fragment.**

1165 **(A)** BACE476 $\Delta$  (filled triangle) and its HA-tagged RHBDL4 (R4-HA) generated N-terminal  
1166 fragment (open triangle) are glycosylated as shown by sensitivity to Endo H (filled and open  
1167 circles). WB, western blotting.

1168 **(B)** Hek293T cells were co-transfected either with RI332 or RPN1 and an empty vector (-),  
1169 R4-HA wild type (wt), or the catalytic inactive SA mutant. RHBDL4 generates several N-  
1170 terminal cleavage fragments (open triangles). Expression of the catalytic mutant stabilizes  
1171 the 40-kDa deglycosylated full-length RI332 (filled circle) even in the absence of the  
1172 proteasome inhibitor MG132

1173 Data information: For clarity, for all panels representative experiments of three independent  
1174 replicates are shown.

1175

1176 **Figure 4 – figure supplement 1. US11 increases turnover of MHC-FL.**

1177 Hek293T cells were transfected with MHC-FL with or without Myc-tagged US11. 24 h post-  
1178 transfection cycloheximide (CHX) was added, and cells were harvested at indicated time  
1179 points (means  $\pm$  SEM, n=4; \*\*\*\*p  $\leq$  0.0001 (two-way ANOVA)). A representative experiment  
1180 of three independent replicates is shown. WB, western blotting.

1181

1182 **Figure 5 – figure supplement 1. RHBDL4 interacts with Erlin1, Erlin2 and RNF170.**

1183 **(A)** Outline of the applied tagging strategy of RHBDL4 (referred to by its gene name *Rhbdd1*)  
1184 according to (Fueller et al., 2020).

1185 **(B)** Sanger sequencing of chromosomal DNA obtained from the Hek293T-R4-FLAG cell lines  
1186 shows the insertion of the FLAG tag in the last coding exon. Colour code as in (A).

1187 **(C)** Microsomes from Hek293T cells were solubilized with 1% Triton X-100, and endogenous  
1188 Erlin1 was isolated by immunoprecipitation (IP). Western blot (WB) identifies co-purification  
1189 of endogenous RHBDL4. Hc, heavy chain.

1190 **(D)** Microsomes from Hek293T cells were solubilized with 1% Triton X-100, and endogenous  
1191 Erlin2 was isolated by immunoprecipitation (IP). WB identifies co-purification of endogenous  
1192 RHBDL4. Hc, heavy chain.

1193 **(E)** Hek293T cells were transfected with empty vector, RHBDL4-GFP or catalytic inactive  
1194 RHBDL4-SA-GFP (SA). Following solubilization with Triton X-100, R4-GFP was isolated by  
1195 immunoprecipitation (IP) using an anti-GFP antibody. Endogenous Erlin2 binds more

1196 efficiently to R4-GFP wild type (wt) than to its catalytic inactive SA mutant. Derlin1 was used  
1197 as a negative control.

1198 **(F)** Co-immunoprecipitation experiment as in (C) using Hek293T cells transfected with  
1199 RNF170-FLAG.

1200 **(G)** Endogenous RHBDL4 is part of an MDa-sized erlin complex. Hek293T wt cells or cells  
1201 with chromosomally FLAG-tagged RHBDL4 (FLAG) were solubilized with 1% Triton X-100,  
1202 immunoprecipitated for FLAG, eluted with FLAG peptides and analyzed by BN-PAGE.  
1203 RHBDL4-FLAG formed several higher molecular weight complexes in addition to the 1.2  
1204 MDa complex containing Erlin2 (filled triangle).

1205 **(H)** Sanger sequencing of genomic DNA obtained from Hek293T Erlin2 knockout cells.  
1206 Single-guide RNA-binding site is underlined; protospacer-associated motif is shown in bold.

1207 **(I)** Sanger sequencing of genomic DNA obtained from Hek293T Erlin1 knockout cells show  
1208 the insertion of the Stop cassette in exon 3. Colour code as in (A). Erlin1/Erlin2 double  
1209 knockout cells were generated accordingly using the Erlin2 knockout cells in (H).

1210 **(J)** Steady-state levels of MHC202 are reduced in Hek293T Erlin1 ( $\Delta$ Erlin1) and Erlin2  
1211 ( $\Delta$ Erlin2) knockout cells compared to wt Hek293T cells. Lysosomal inhibition by BafA1  
1212 increases stabilization of MHC202 caused by single knockout of Erlin1 and Erlin2 (n=1).  
1213 Data information: For clarity, for panels C-G representative experiments of three independent  
1214 replicates are shown.

1215

1216 **Figure 6 – figure supplement 1. The RHBDL4-erlin complex interacts with aggregation-**  
1217 **prone proteins.**

1218 **(A)** Western blotting (WB) after immunoprecipitation (IP) of Erlin2-HA from Triton X-100  
1219 solubilized Hek293T cells confirms interaction with ER $\beta$  as has been shown previously  
1220 (Vincenz-Donnelly et al., 2018).

1221 **(B)** Steady-state levels of  $\gamma$ -fibrinogen R375W mutant increase in Erlin1/Erlin2 Hek293T  
1222 double knockout cells ( $\Delta\Delta$ E1E2) in comparison to parental wild-type Hek293T cells (wt). GFP  
1223 was used as a loading control. Right panel, WB quantification of  $\gamma$ -fibrinogen R375W (means  
1224  $\pm$  SEM, n=5, \*\*\*p $\leq$  0.001 (Student's t-test)).

1225 **(C)** ER $\beta$  steady-state levels increase in Hek293T cells transfected with two independent  
1226 shRNAs targeting RHBDL4 (R4-1 and R4-2) compared to non-targeting control (nt).  
1227 Knockdown of RHBDL4 further increases the recovery of ER $\beta$  in the NP40 insoluble fraction.  
1228 p97 was used as a loading control for the soluble fraction and H2B for the insoluble fraction.

1229 **(D)**  $\gamma$ -fibrinogen steady-state levels increase in Hek293T cells transfected with two  
1230 independent shRNAs targeting RHBDL4 (R4-1 and R4-2) compared to cell treated with non-  
1231 targeting control (nt) in Hek293T cells. Knockdown of RHBDL4 further increases the recovery

1232 of  $\gamma$ -fibrinogen in the NP40 insoluble fraction. p97 was used as a loading control for the  
1233 soluble fraction and H2B for the insoluble fraction.

1234 **(E)** Assay as shown in (E) analysing the steady-state levels of the  $\gamma$ -fibrinogen R375W  
1235 mutant. Knockdown of RHBDL4 further increases the recovery of  $\gamma$ -fibrinogen R375W in the  
1236 NP40 insoluble fraction. p97 was used as a loading control for soluble fraction and H2B for  
1237 insoluble fraction, respectively.

1238 Data information: For clarity, for panels A and C-F representative experiments of three  
1239 independent replicates are shown. For panel B a representative experiment of five  
1240 independent replicates is shown.

**Bock et al. Figure 1 - figure supplement 1**

**A**

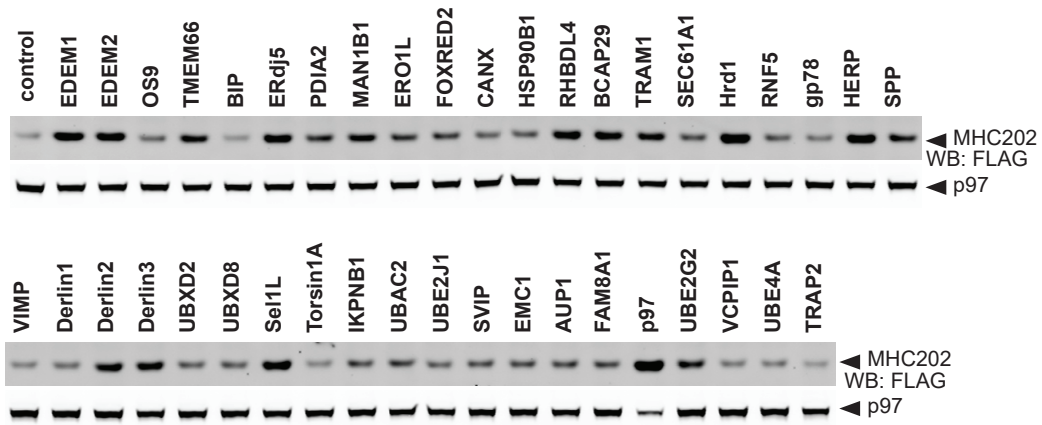

**B**

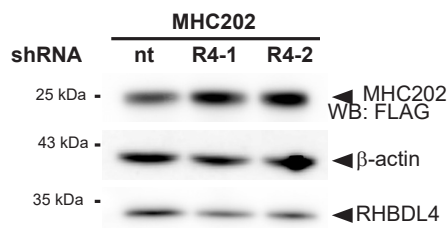

**C**

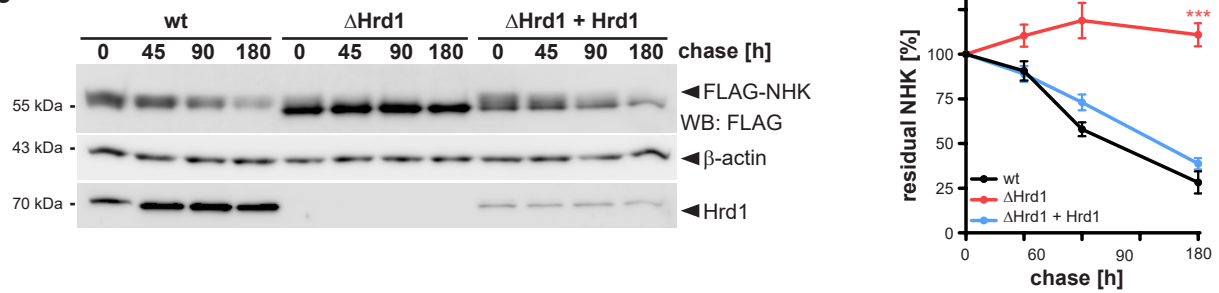

**D**

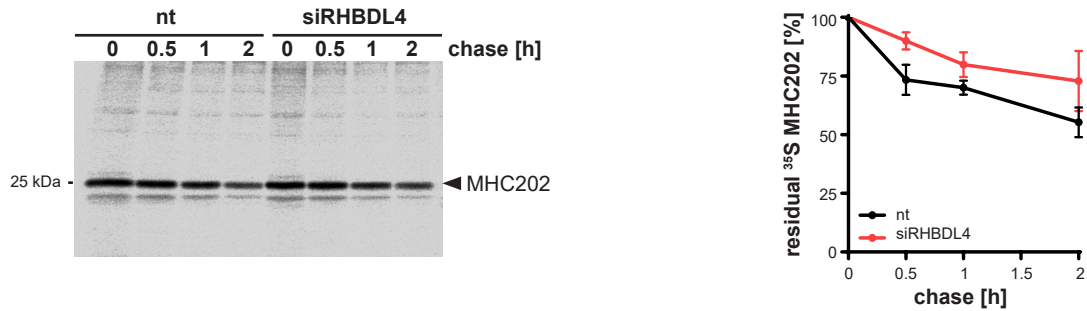

**E**

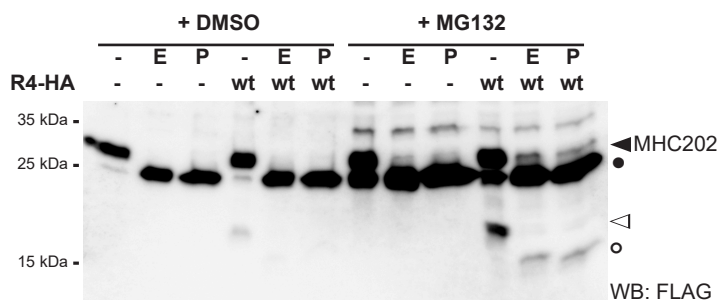

**F**

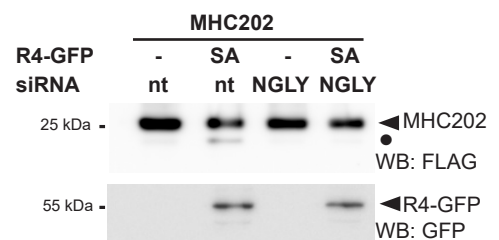

**Bock et al. Figure 2 - figure supplement 1**

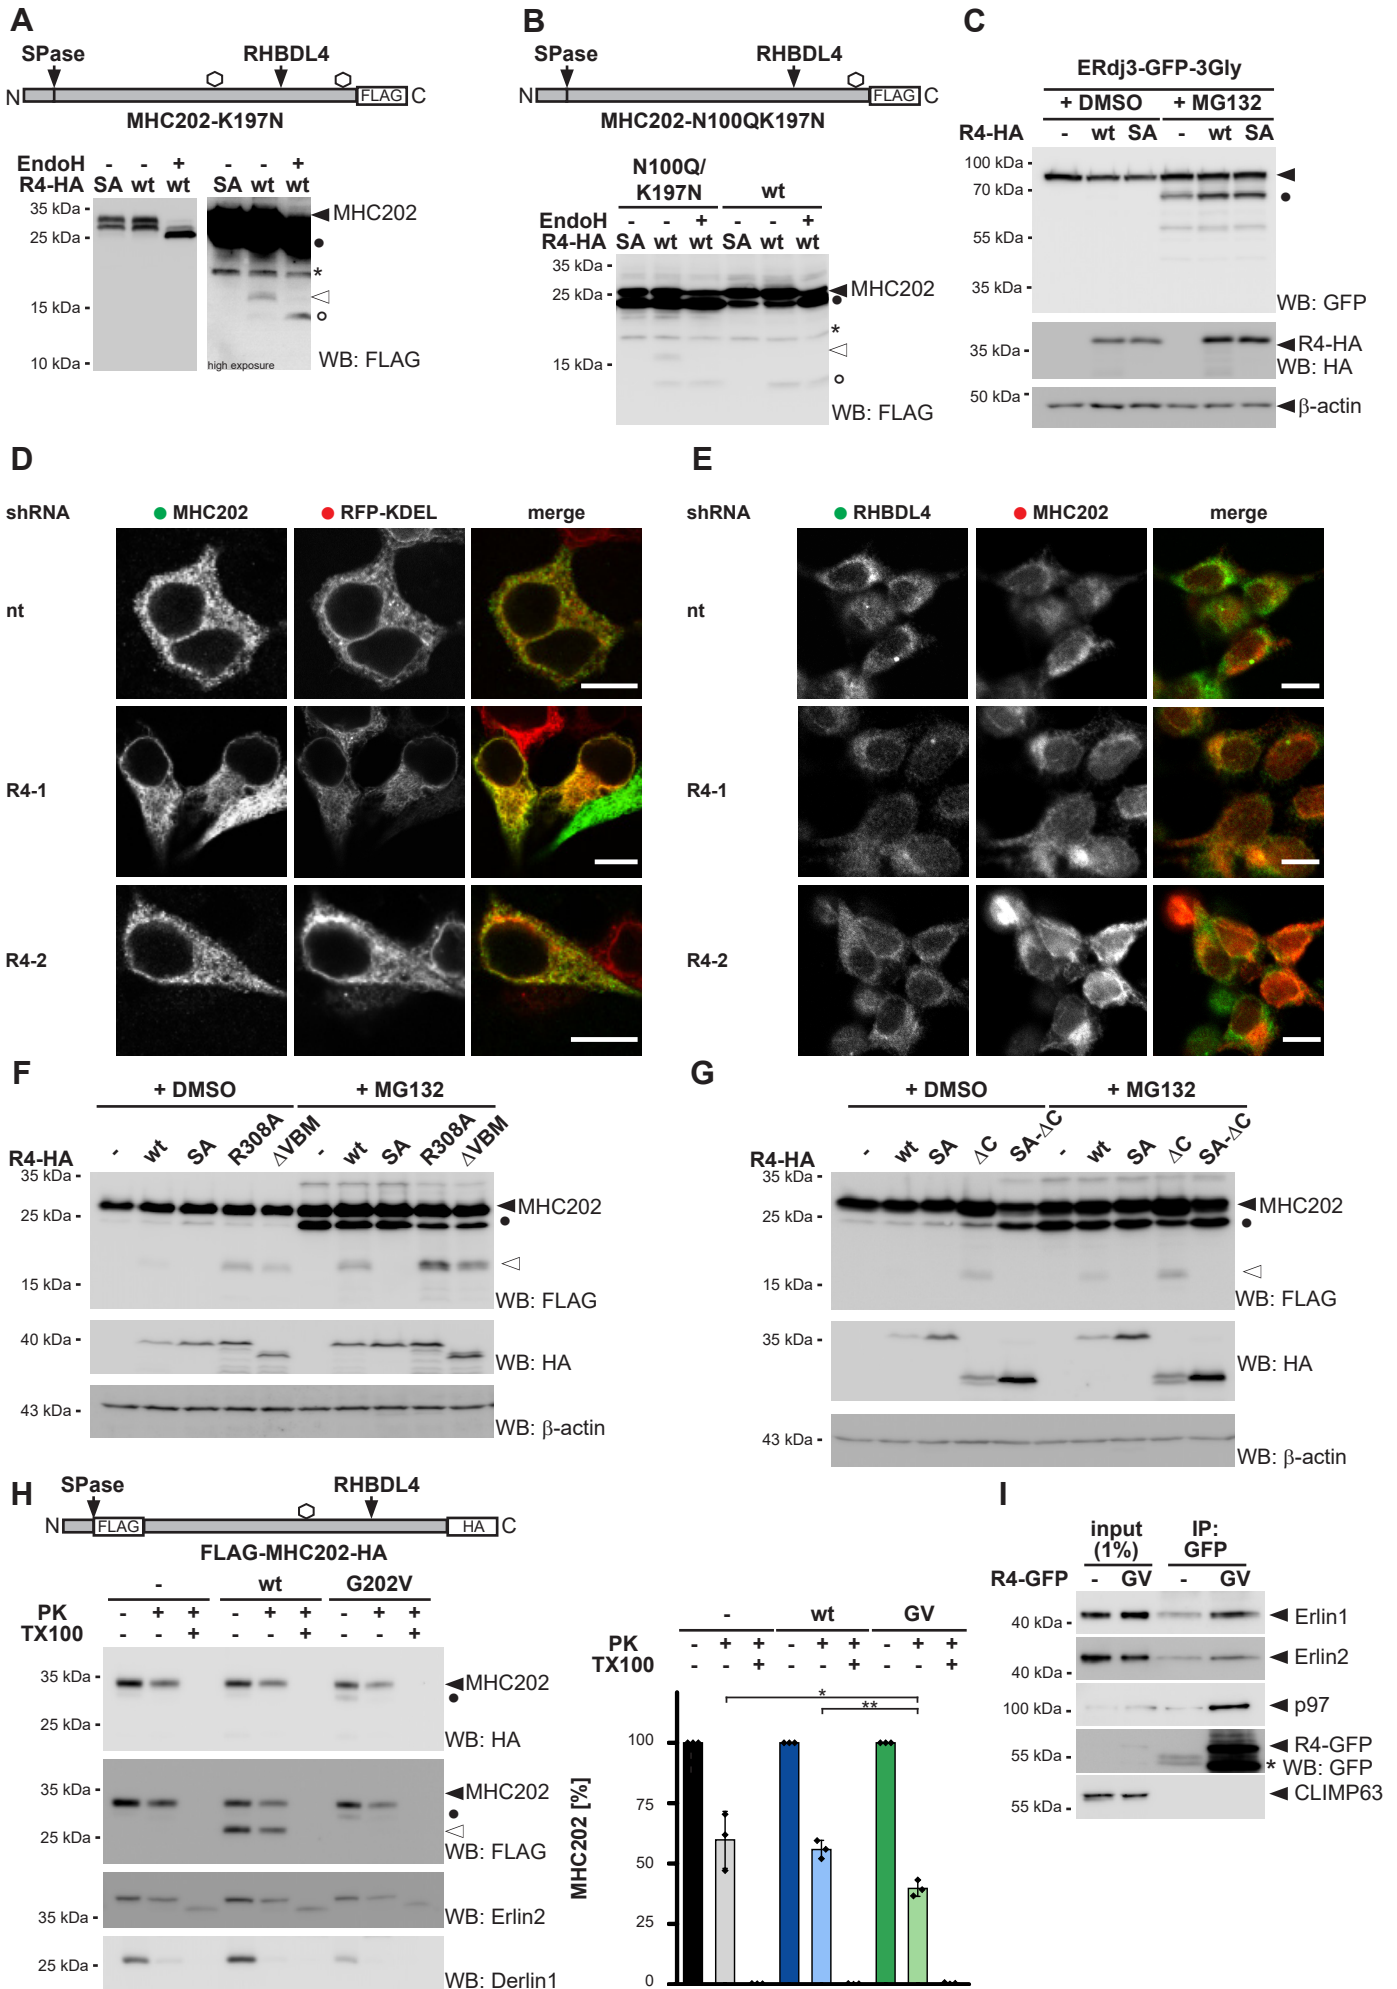

## Bock *et al.* Figure 3 - figure supplement 1

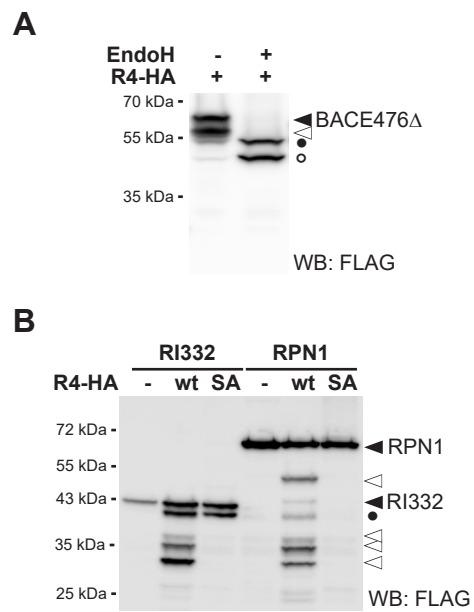

## Bock *et al.* Figure 4 - figure supplement 1

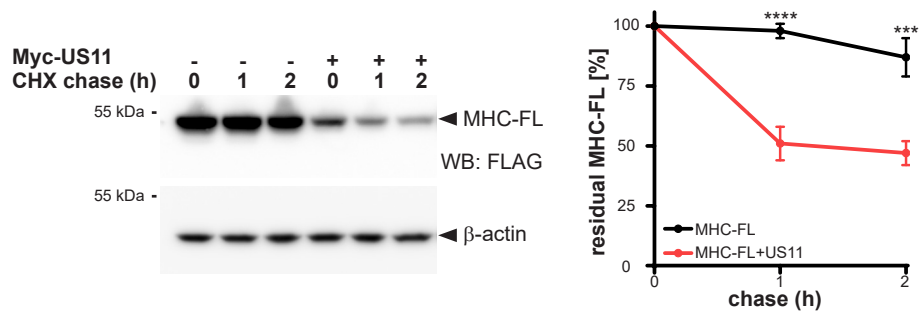



## Bock et al. Figure 5 - figure supplement 1

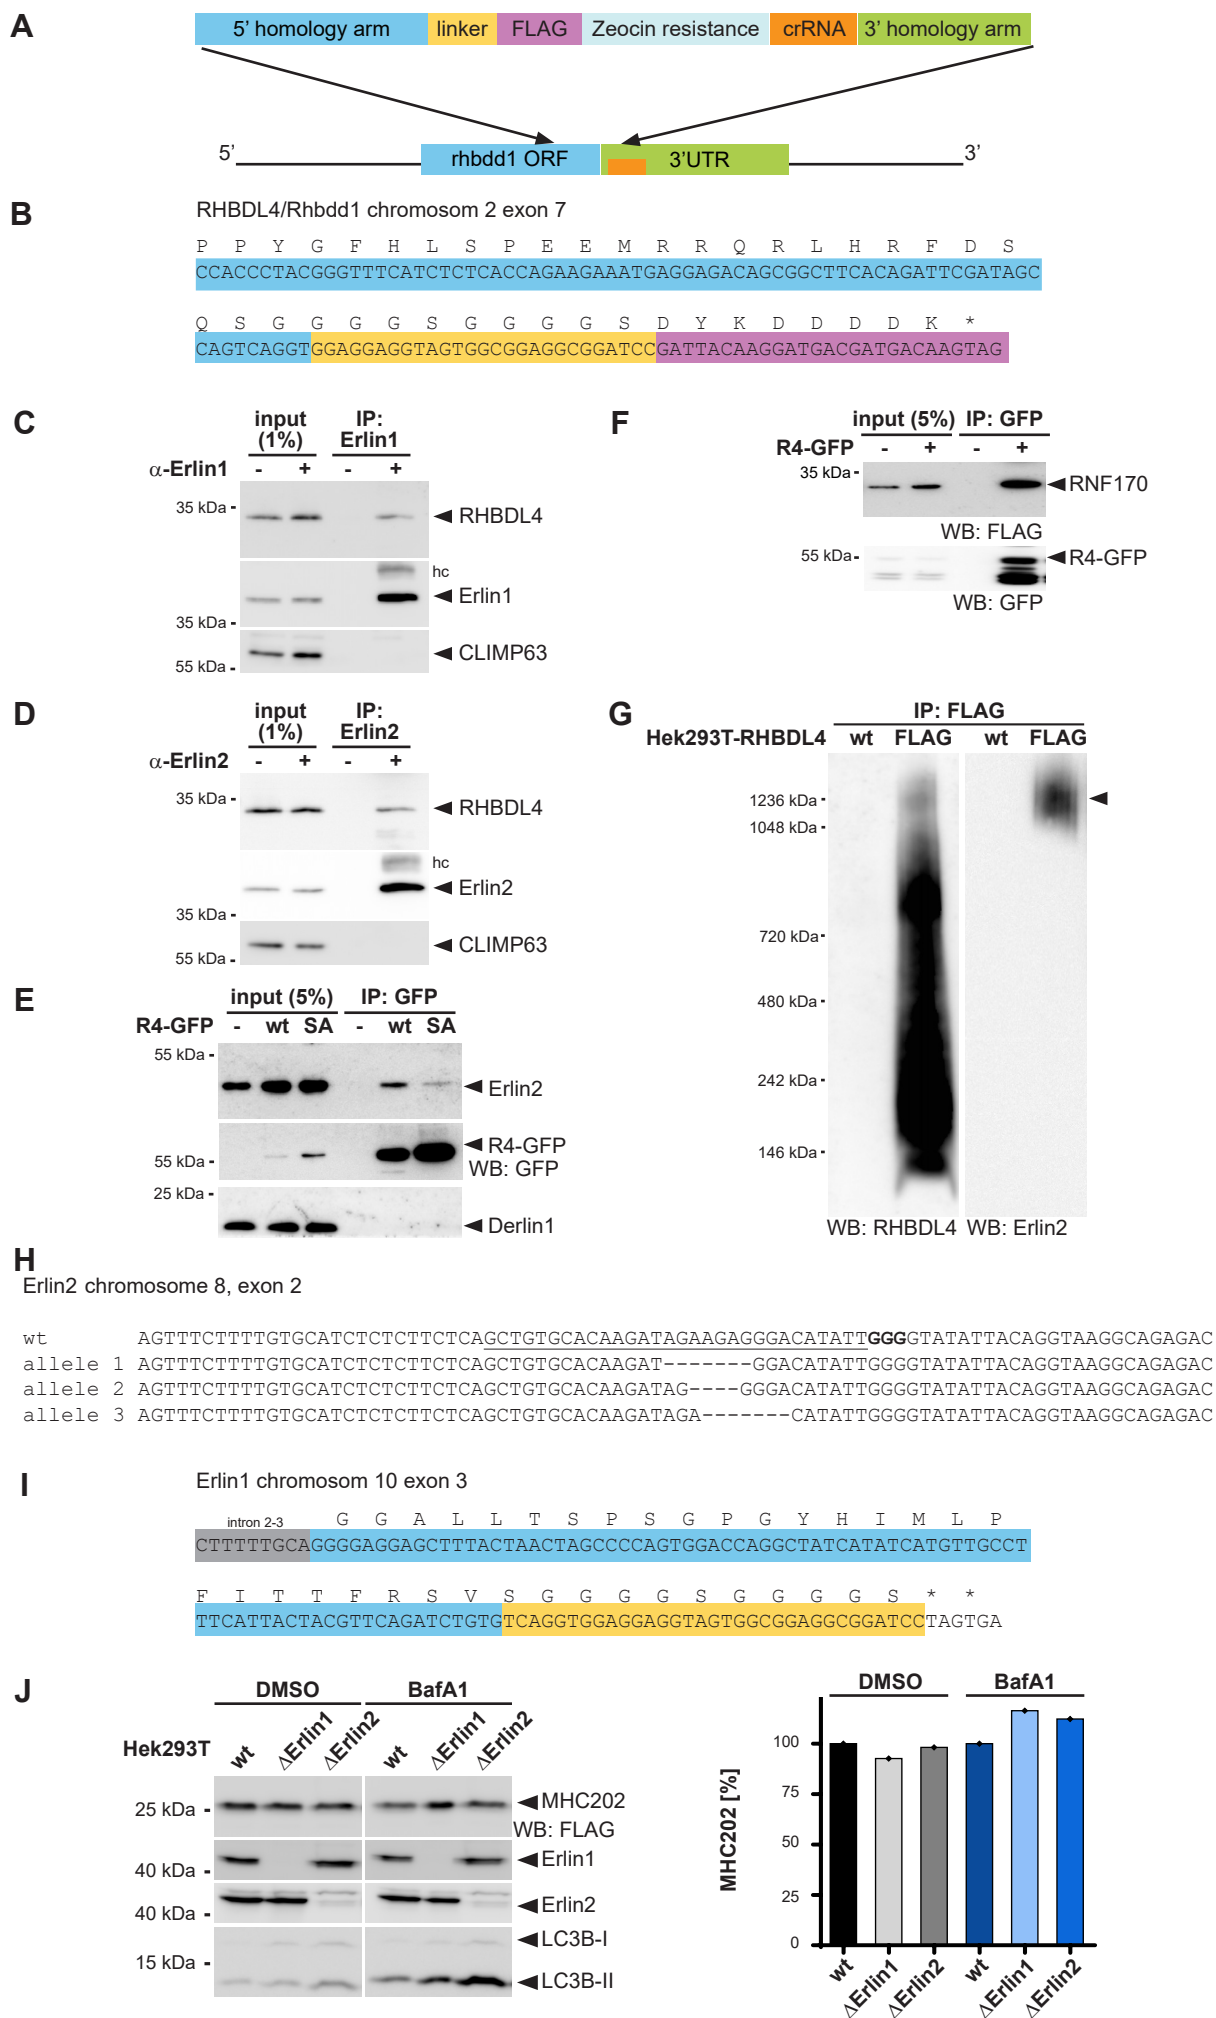

**Bock et al. Figure 6 - figure supplement 1**

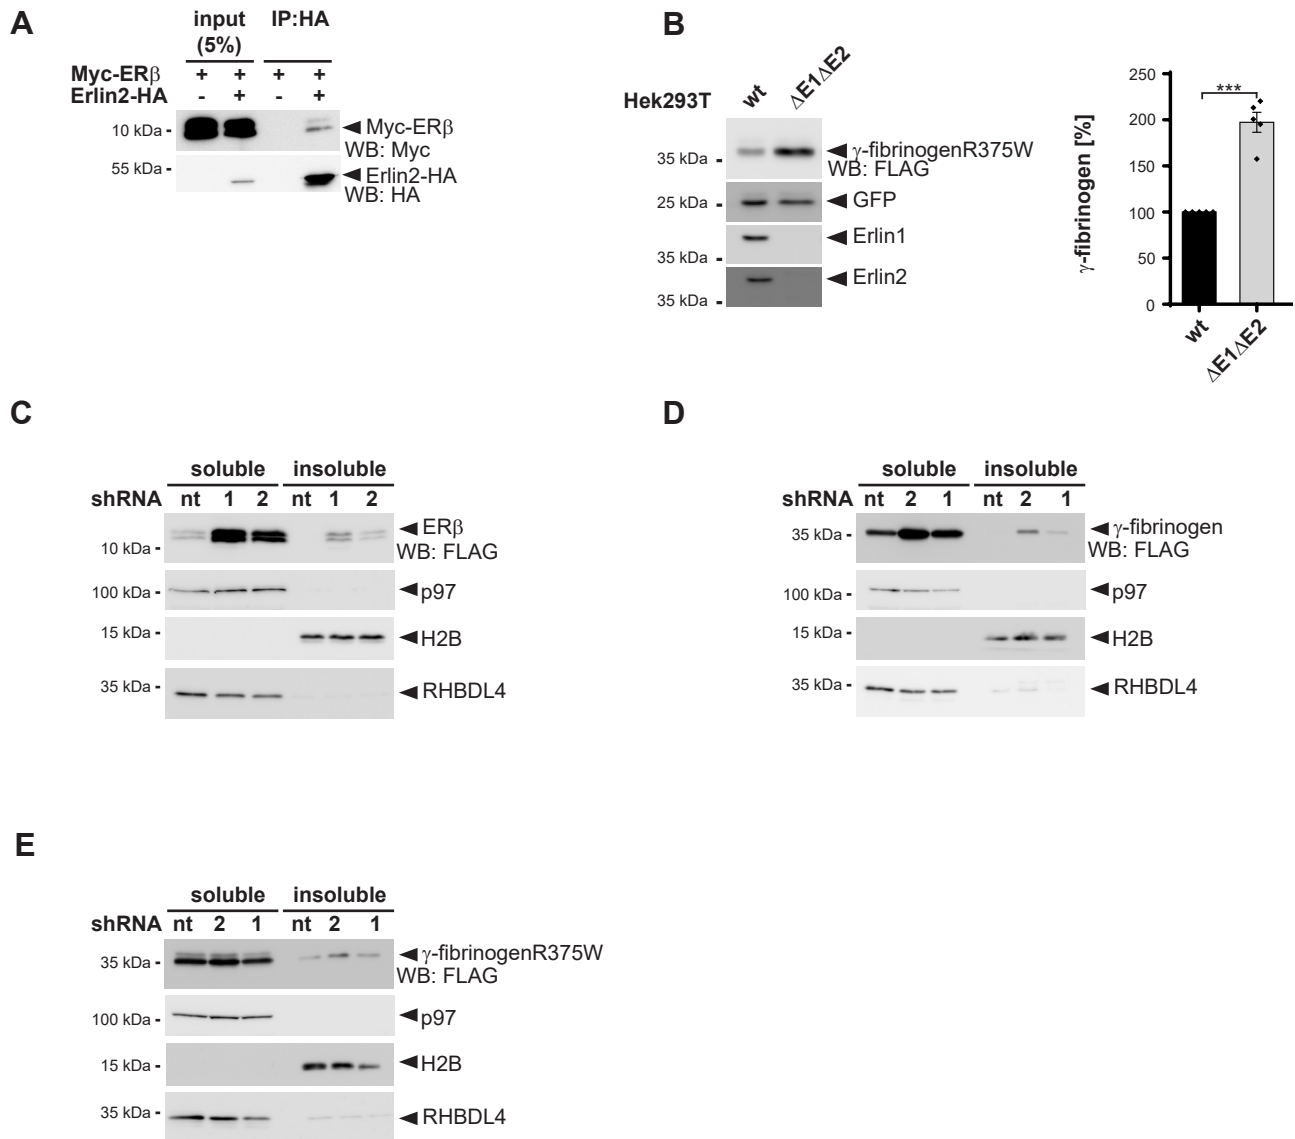

Source: https://www.biorxiv.org/content/10.1101/848754v2.full.pdf
